# Supplementary material for: Design, synthesis and activity evaluation of arctigenin derivatives with HDAC inhibition activity
Source: Royal Society of Chemistry journal article supplement (doi:10.1039/d4ra00050a), 2024-01-01

## Design, Synthesis, and Activity Evaluation of Arctigenin Derivatives with HDAC Inhibition Activity

Xinyue Jiang,<sup>a</sup> Yuchao Yan,<sup>a</sup> Huali Yang,<sup>a</sup> Maosheng Cheng,<sup>a</sup> Deqiang Dou,<sup>\*b</sup> Yang Liu<sup>\*a</sup>

<sup>a</sup> Key Laboratory of Structure-Based Drug Design & Discovery, Ministry of Education, School of Pharmaceutical Engineering, Shenyang Pharmaceutical University, Shenyang 110016, China

<sup>b</sup> Department of Chinese Medicine Chemistry, Liaoning University of Traditional Chinese Medicine, Dalian, China

### 1. The <sup>1</sup>H and <sup>13</sup>C spectra of the compounds (A1 - A10, B1 - B8)

Figure S1. <sup>1</sup>H NMR, <sup>13</sup>C NMR, FT-MS, HPLC of A1

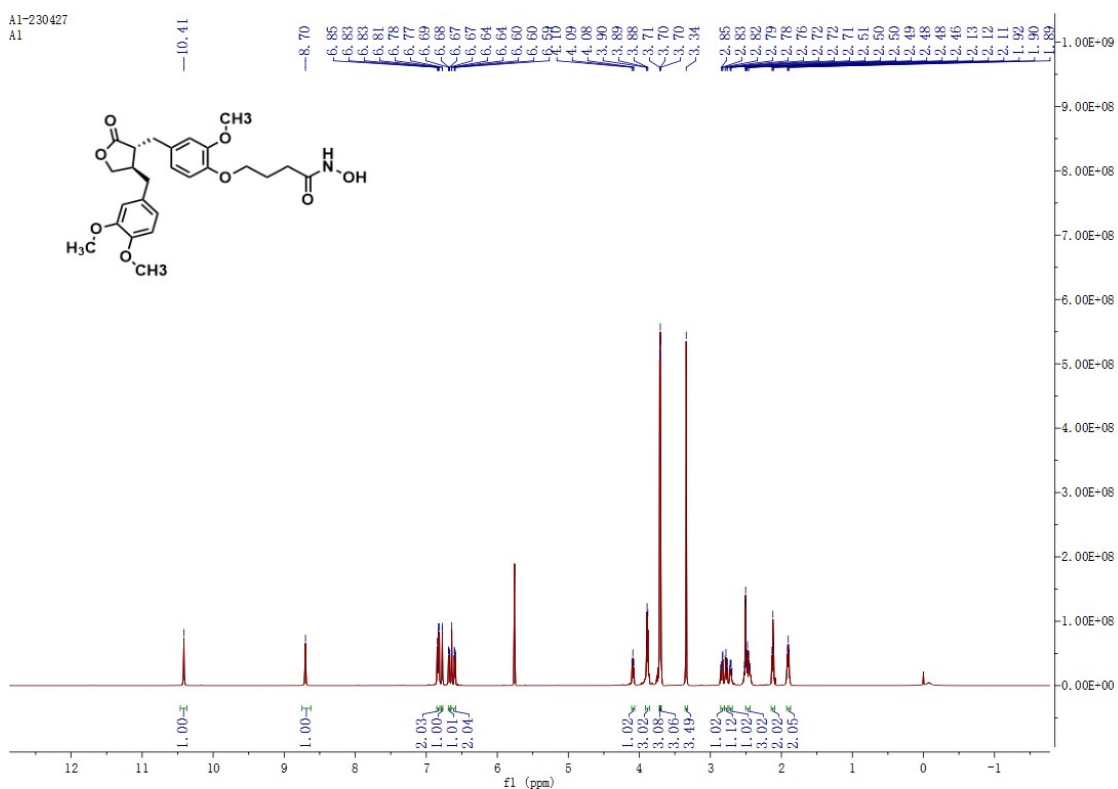

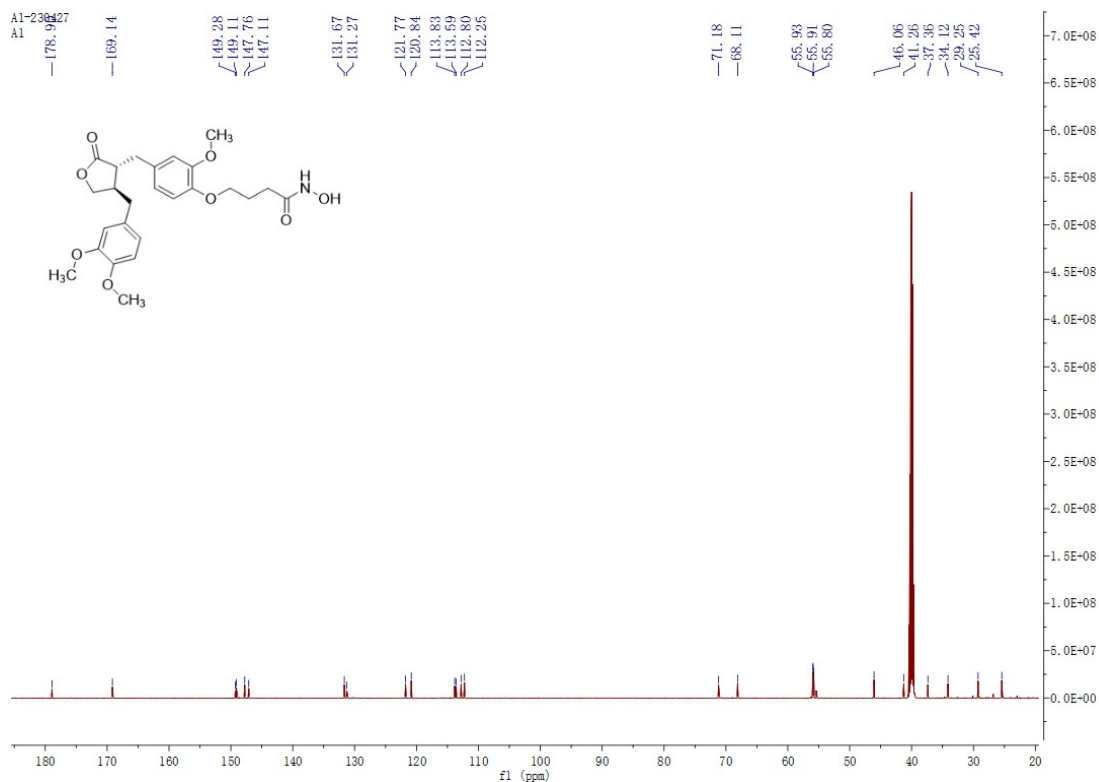

## Mass Spectrum SmartFormula Report

### Analysis Info

Analysis Name D:\data\Sample Detection\20230511\A1 pos\_000001.d  
Method 20230410 pos 100-2000  
Sample Name  
Comment

Acquisition Date 5/11/2023 2:22:56 PM

Operator  
Instrument solarix

### Acquisition Parameter

|                       |            |                      |           |                           |                          |
|-----------------------|------------|----------------------|-----------|---------------------------|--------------------------|
| Acquisition Mode      | Single MS  | Acquired Scans       | 8         | Calibration Date          | Mon Apr 10 10:10:45 2023 |
| Polarity              | Positive   | No. of Cell Fills    | 1         | Data Acquisition Size     | 1048576                  |
| Broadband Low Mass    | 100.3 m/z  | No. of Laser Shots   | 500       | Data Processing Size (SI) | 2097152                  |
| Broadband High Mass   | 2000.0 m/z | Laser Power          | 20.0 lp   | Apodization               | Full-Sine                |
| Source Accumulation   | 0.000 sec  | Laser Shot Frequency | 0.001 sec |                           |                          |
| Ion Accumulation Time | 0.100 sec  |                      |           |                           |                          |

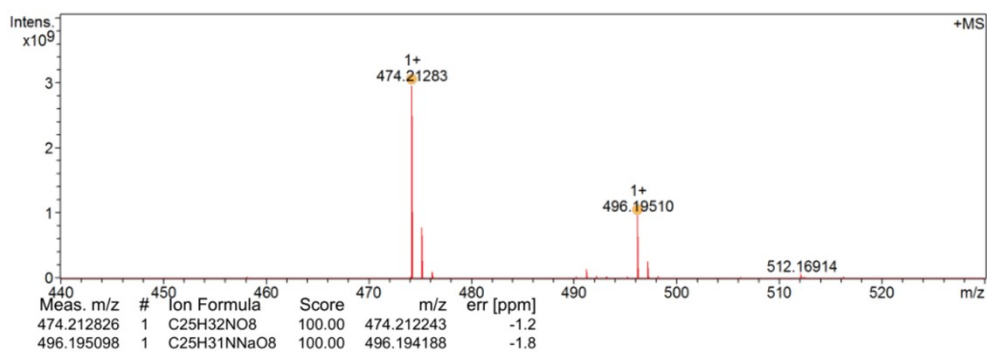

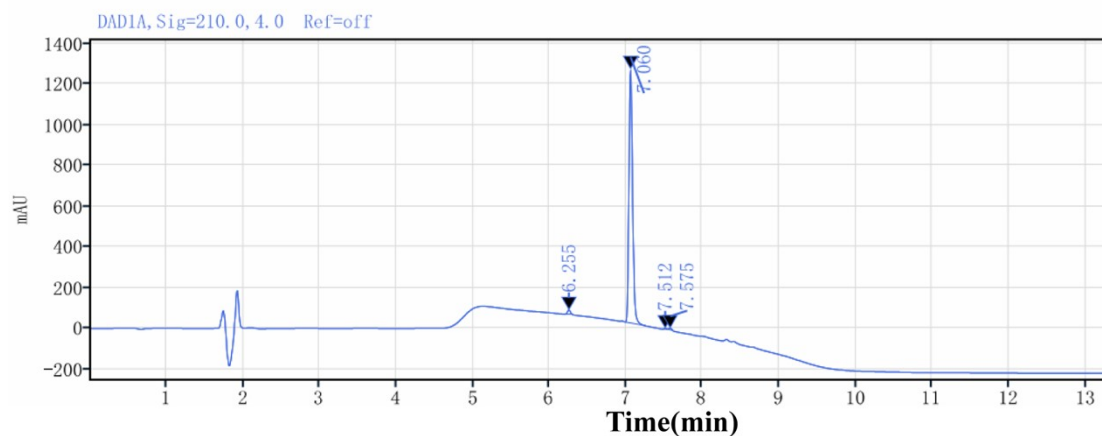

| Retention Time [min] | Type | Peak Width [min] | Peak Area | Peak Height | Peak Area (%) |
|----------------------|------|------------------|-----------|-------------|---------------|
| 6.255                | MM m | 0.09             | 54.86     | 20.92       | 1.27          |
| 7.060                | MM m | 0.26             | 4236.57   | 1250.03     | 98.24         |
| 7.512                | MM m | 0.06             | 5.35      | 2.87        | 0.12          |
| 7.575                | MM m | 0.07             | 15.85     | 7.18        | 0.37          |

**Figure S2.  $^1\text{H}$  NMR,  $^{13}\text{C}$  NMR, FT-MS, HPLC of A2**

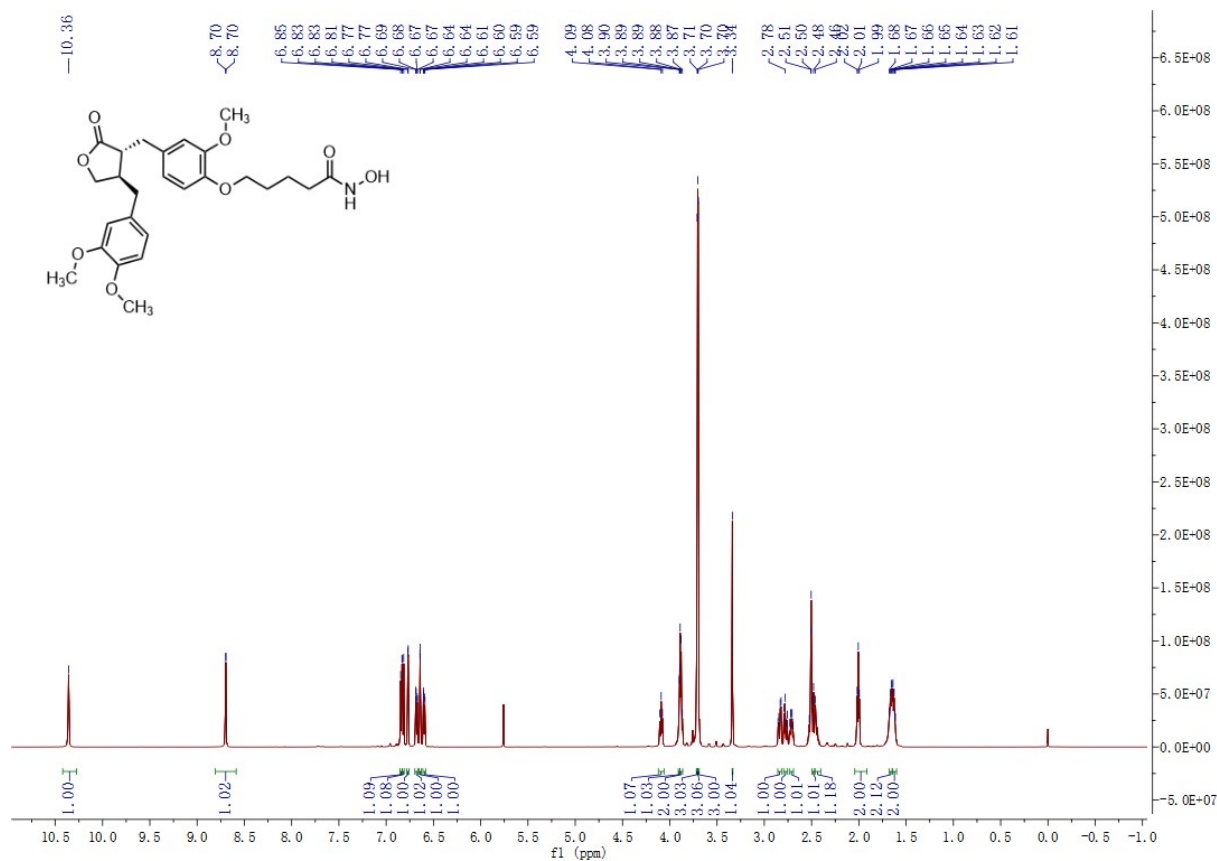

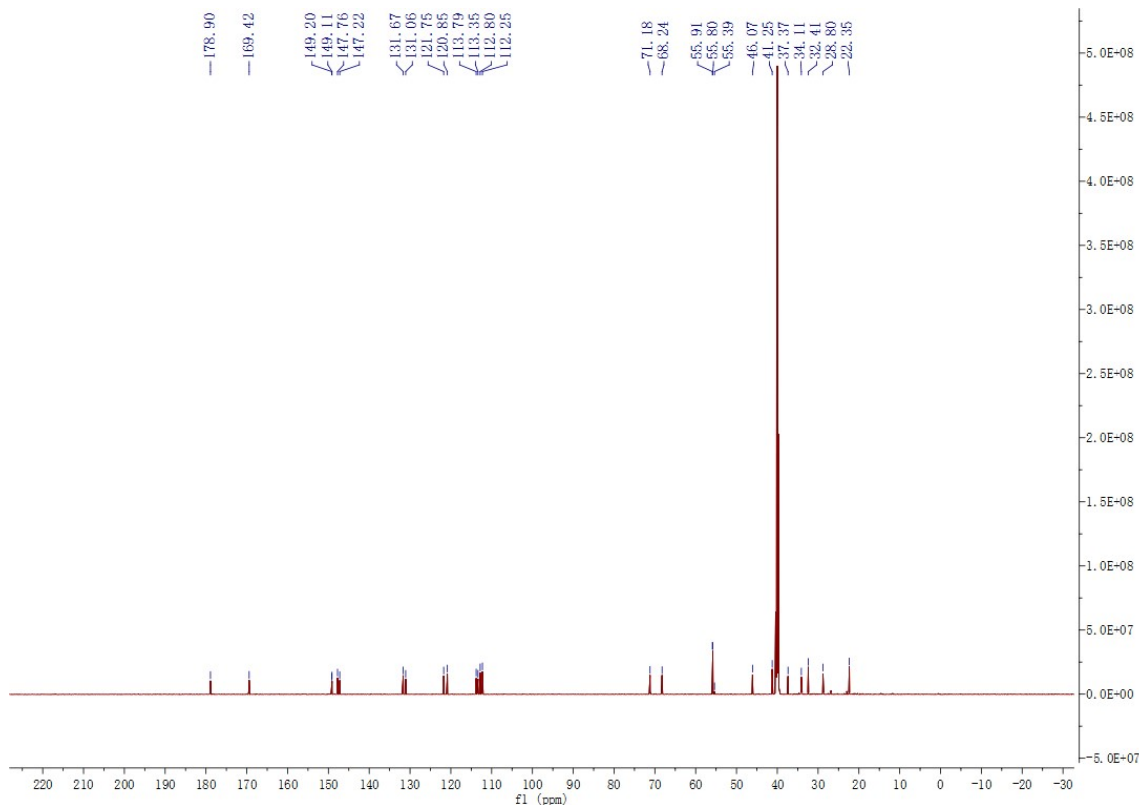

## Mass Spectrum SmartFormula Report

### Analysis Info

Analysis Name D:\data\Sample Detection\20230524\A2 pos\_000001.d  
 Method 20230410 pos 100-2000  
 Sample Name  
 Comment

Acquisition Date 5/24/2023 12:07:44 PM

Operator  
 Instrument solariX

### Acquisition Parameter

|                       |            |                      |           |                           |                          |
|-----------------------|------------|----------------------|-----------|---------------------------|--------------------------|
| Acquisition Mode      | Single MS  | Acquired Scans       | 8         | Calibration Date          | Mon Apr 10 10:10:45 2023 |
| Polarity              | Positive   | No. of Cell Fills    | 1         | Data Acquisition Size     | 1048576                  |
| Broadband Low Mass    | 100.3 m/z  | No. of Laser Shots   | 500       | Data Processing Size (SI) | 2097152                  |
| Broadband High Mass   | 2000.0 m/z | Laser Power          | 20.0 lp   | Apodization               | Full-Sine                |
| Source Accumulation   | 0.000 sec  | Laser Shot Frequency | 0.001 sec |                           |                          |
| Ion Accumulation Time | 0.100 sec  |                      |           |                           |                          |

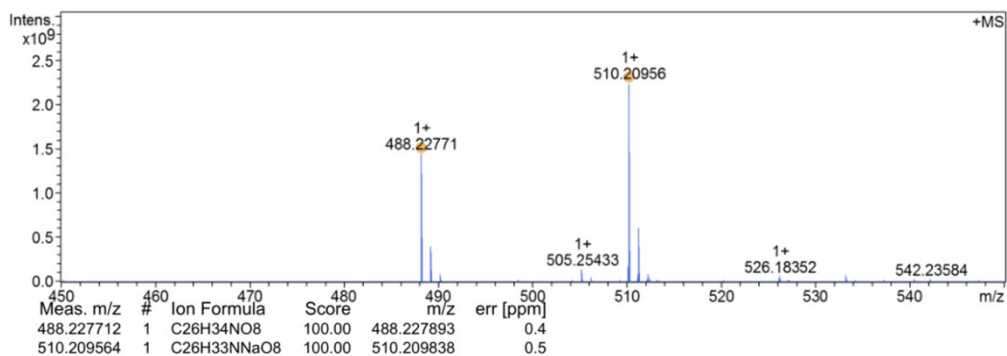

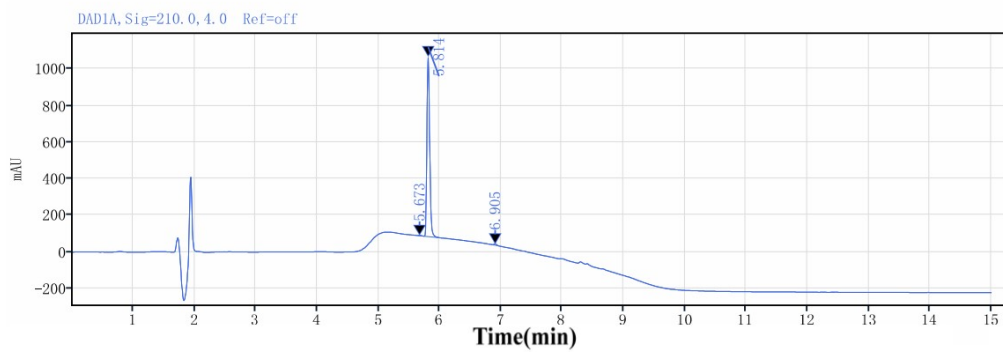

| Retention Time [min] | Type | Peak Width [min] | Peak Area | Peak Height | Peak Area (%) |
|----------------------|------|------------------|-----------|-------------|---------------|
| 5.673                | MM m | 0.06             | 3.70      | 1.49        | 0.12          |
| 5.814                | MM m | 0.27             | 3110.79   | 985.38      | 99.27         |
| 6.905                | MM m | 0.10             | 19.08     | 6.76        | 0.61          |

**Figure S3.  $^1\text{H}$  NMR,  $^{13}\text{C}$  NMR, FT-MS, HPLC of A3**

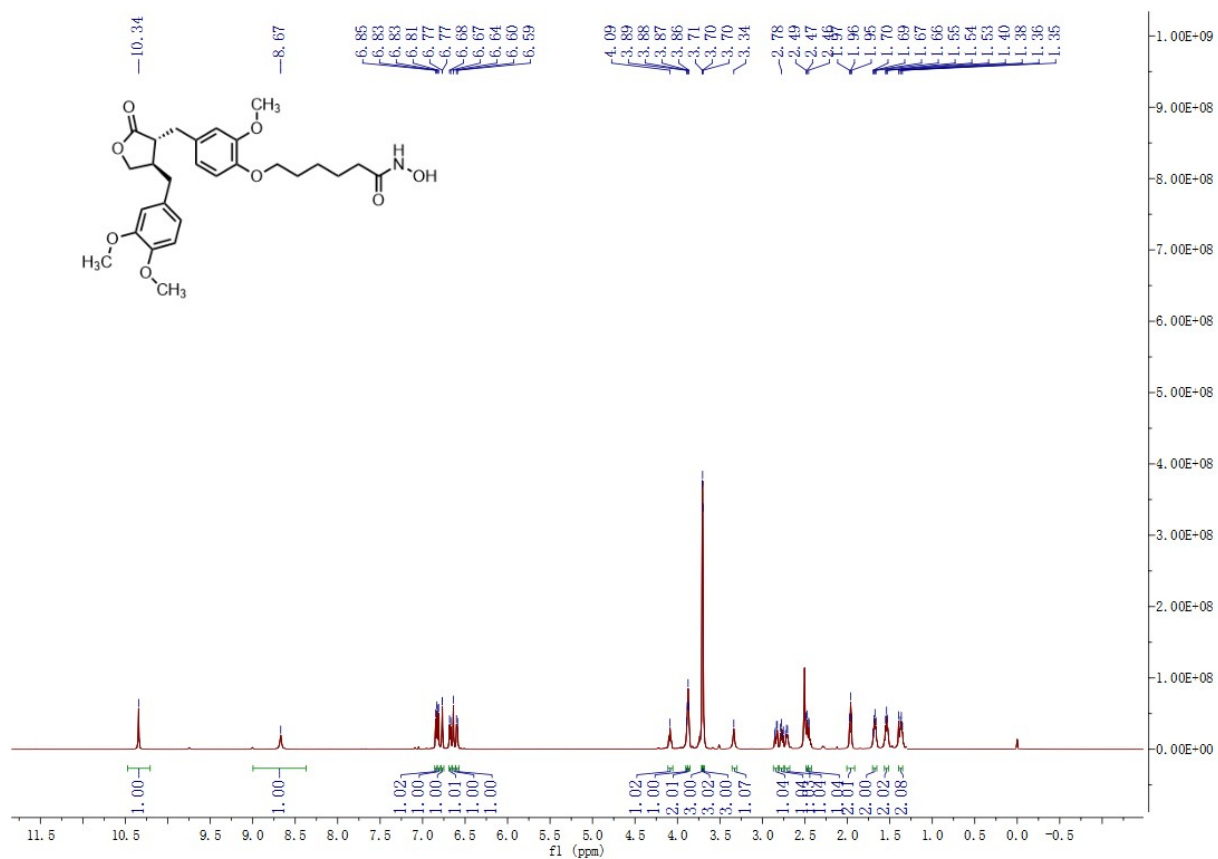

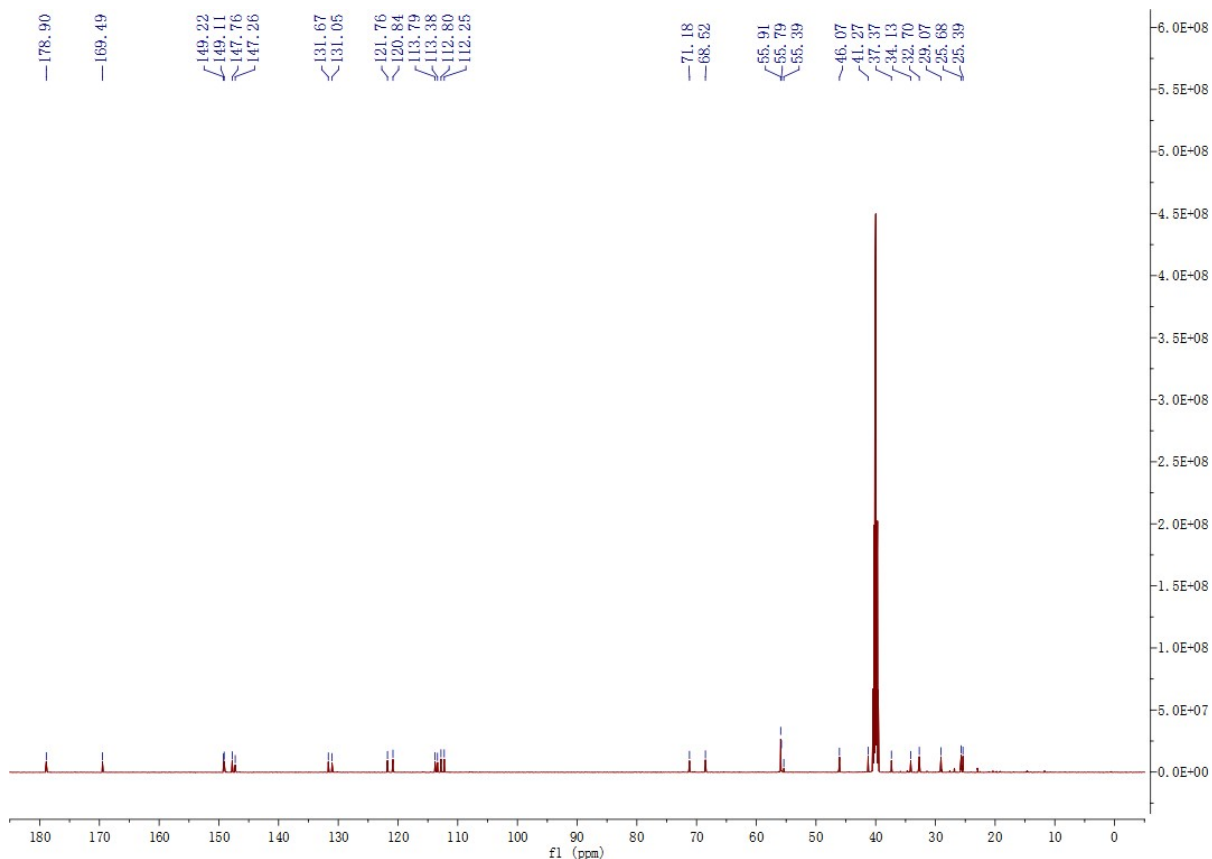

## Mass Spectrum SmartFormula Report

### Analysis Info

Analysis Name D:\data\Sample Detection\20230524\A3 pos\_000001.d  
 Method 20230410 pos 100-2000  
 Sample Name  
 Comment

Acquisition Date 5/24/2023 12:13:42 PM

Operator  
 Instrument solariX

### Acquisition Parameter

|                       |            |                      |           |                           |                          |
|-----------------------|------------|----------------------|-----------|---------------------------|--------------------------|
| Acquisition Mode      | Single MS  | Acquired Scans       | 8         | Calibration Date          | Mon Apr 10 10:10:45 2023 |
| Polarity              | Positive   | No. of Cell Fills    | 1         | Data Acquisition Size     | 1048576                  |
| Broadband Low Mass    | 100.3 m/z  | No. of Laser Shots   | 500       | Data Processing Size (SI) | 2097152                  |
| Broadband High Mass   | 2000.0 m/z | Laser Power          | 20.0 lp   | Apodization               | Full-Sine                |
| Source Accumulation   | 0.000 sec  | Laser Shot Frequency | 0.001 sec |                           |                          |
| Ion Accumulation Time | 0.100 sec  |                      |           |                           |                          |

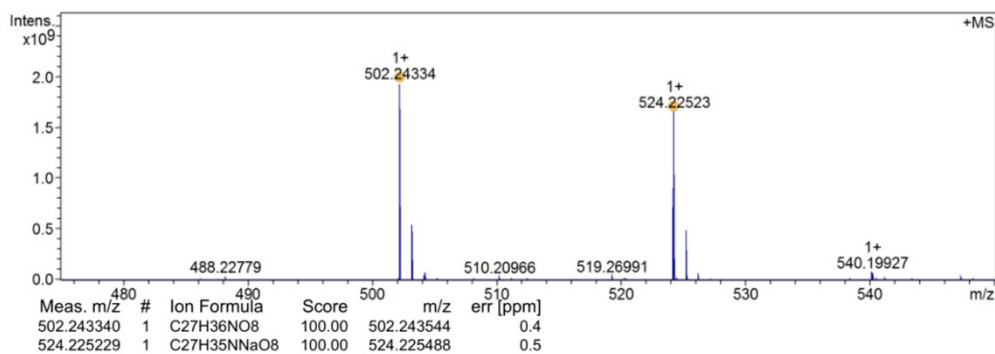

| Meas. m/z  | # | Ion Formula | Score  | m/z        | err [ppm] |
|------------|---|-------------|--------|------------|-----------|
| 502.243340 | 1 | C27H36NO8   | 100.00 | 502.243544 | 0.4       |
| 524.225229 | 1 | C27H35NNaO8 | 100.00 | 524.225488 | 0.5       |

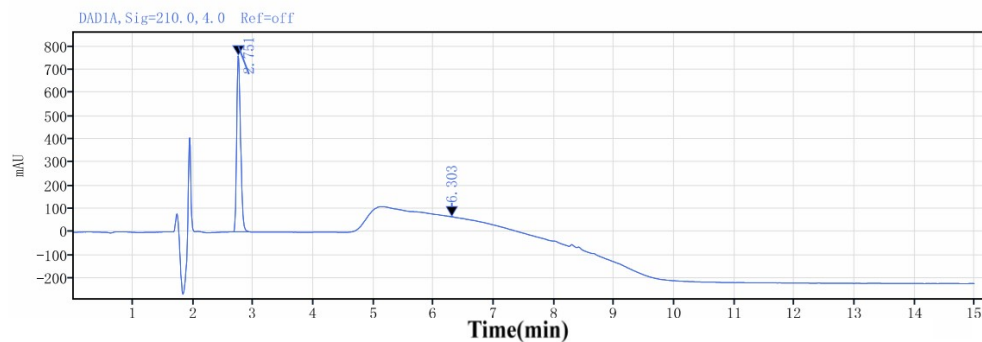

| Retention Time [min] | Type | Peak Width [min] | Peak Area | Peak Height | Peak Area (%) |
|----------------------|------|------------------|-----------|-------------|---------------|
| 2.751                | MM m | 0.29             | 3464.83   | 760.99      | 99.87         |
| 6.303                | MM m | 0.13             | 4.49      | 0.98        | 0.13          |

**Figure S4.  $^1\text{H}$  NMR,  $^{13}\text{C}$  NMR, FT-MS, HPLC of A4**

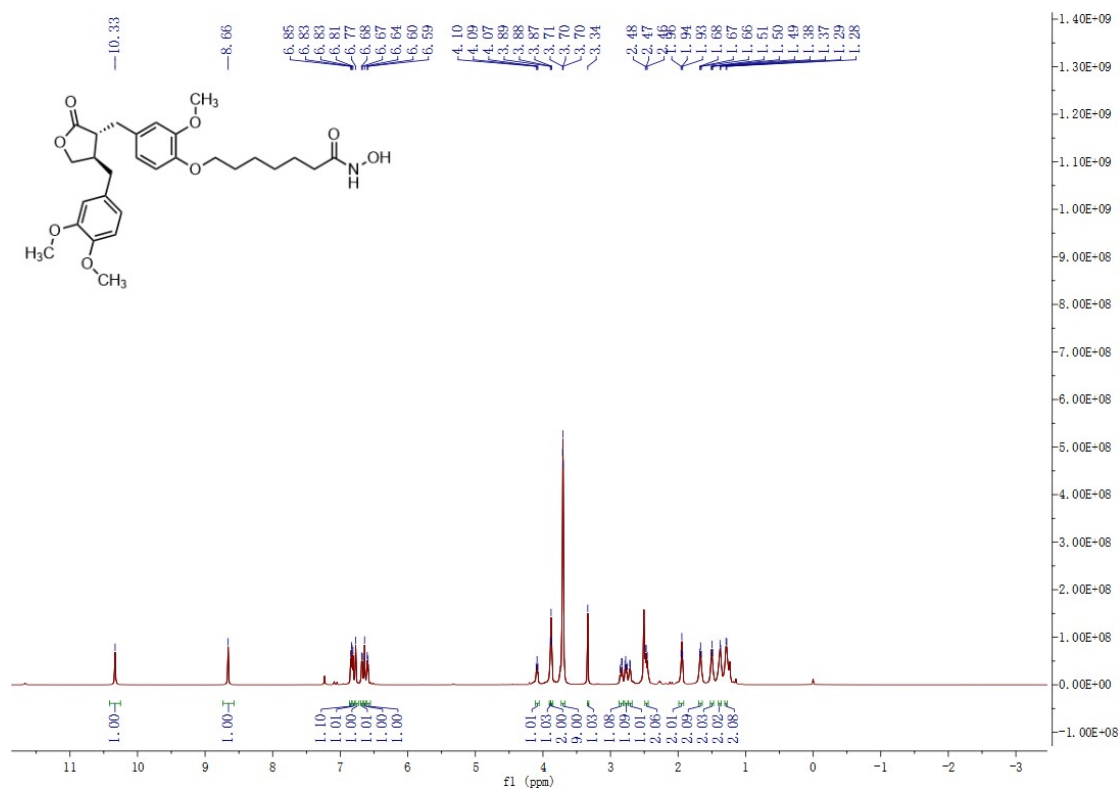

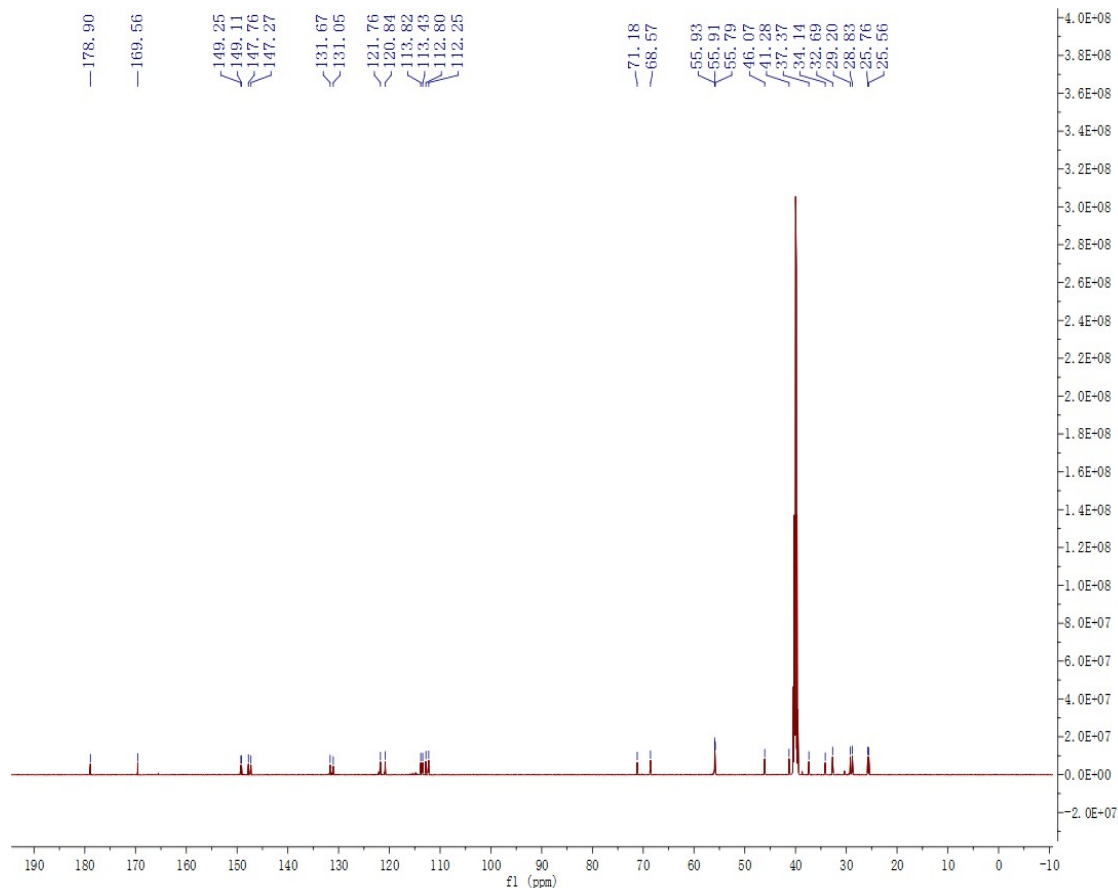

## Mass Spectrum SmartFormula Report

### Analysis Info

Analysis Name D:\data\Sample Detection\20230524\VA4 pos\_000001.d  
 Method 20230410 pos 100-2000  
 Sample Name  
 Comment

Acquisition Date 5/24/2023 12:21:18 PM

Operator  
 Instrument solariX

### Acquisition Parameter

|                       |            |                      |           |                           |                          |
|-----------------------|------------|----------------------|-----------|---------------------------|--------------------------|
| Acquisition Mode      | Single MS  | Acquired Scans       | 8         | Calibration Date          | Mon Apr 10 10:10:45 2023 |
| Polarity              | Positive   | No. of Cell Fills    | 1         | Data Acquisition Size     | 1048576                  |
| Broadband Low Mass    | 100.3 m/z  | No. of Laser Shots   | 500       | Data Processing Size (SI) | 2097152                  |
| Broadband High Mass   | 2000.0 m/z | Laser Power          | 20.0 lp   | Apodization               | Full-Sine                |
| Source Accumulation   | 0.000 sec  | Laser Shot Frequency | 0.001 sec |                           |                          |
| Ion Accumulation Time | 0.100 sec  |                      |           |                           |                          |

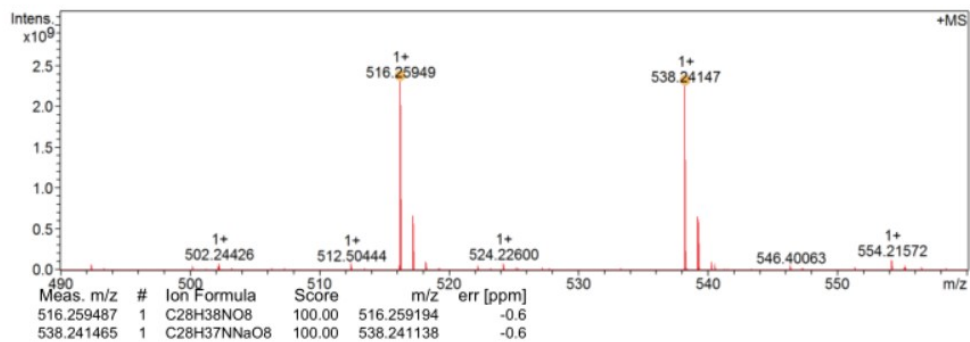



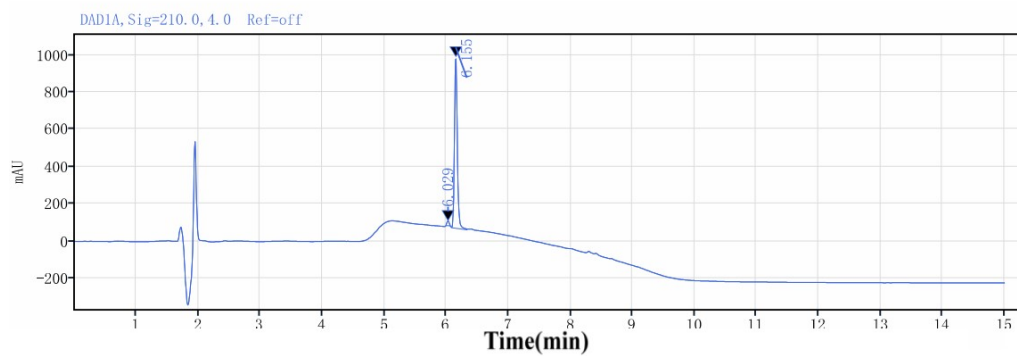

| Retention Time [min] | Type | Peak Width [min] | Peak Area | Peak Height | Peak Area (%) |
|----------------------|------|------------------|-----------|-------------|---------------|
| 6.029                | MM m | 0.07             | 60.83     | 25.44       | 1.99          |
| 6.155                | MM m | 0.25             | 2993.56   | 917.62      | 98.01         |

**Figure S5.  $^1\text{H}$  NMR,  $^{13}\text{C}$  NMR, FT-MS, HPLC of A5**

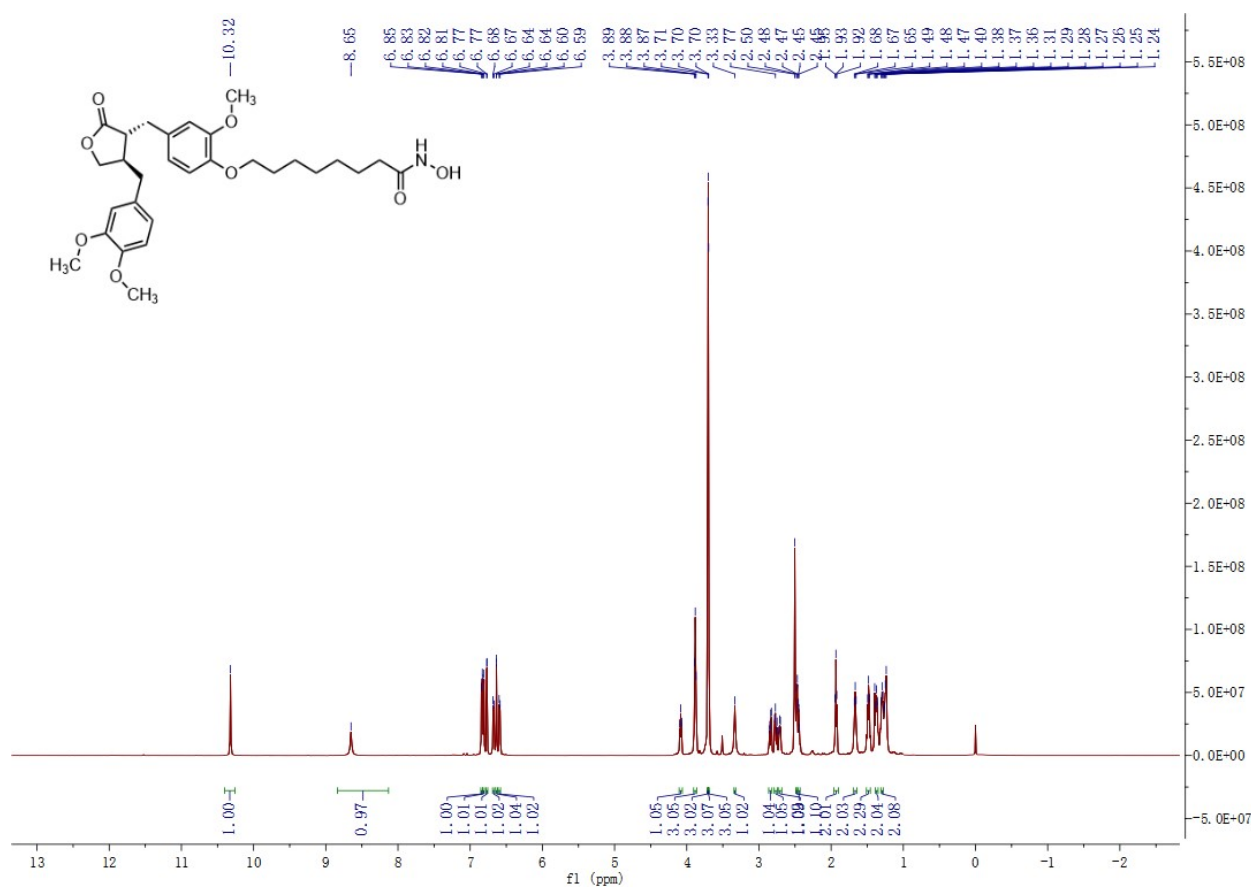

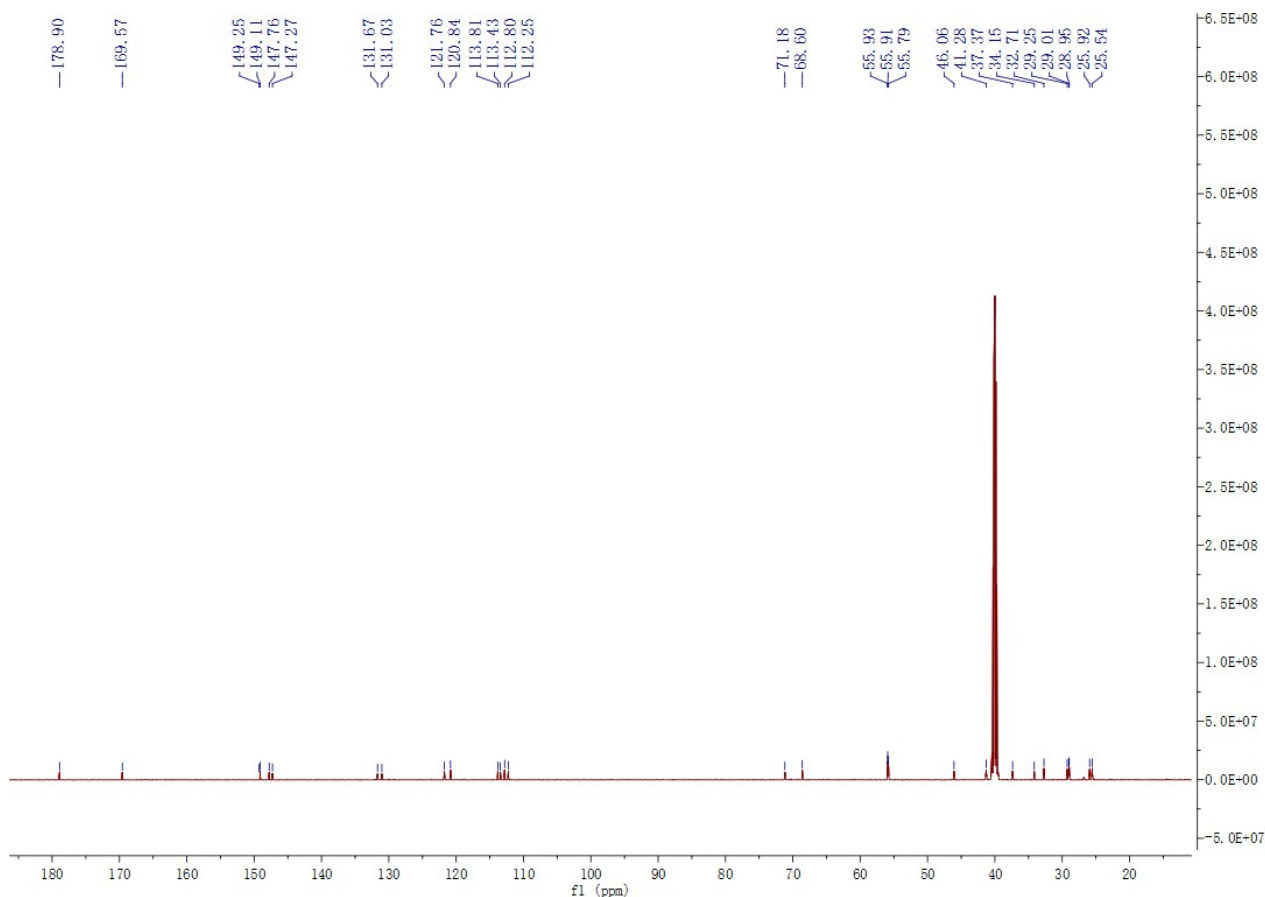

## Mass Spectrum SmartFormula Report

### Analysis Info

Analysis Name D:\data\Sample Detection\20230524\A5 pos\_000003.d  
 Method 20230410 pos 100-2000  
 Sample Name  
 Comment

Acquisition Date 5/24/2023 12:34:23 PM

Operator  
 Instrument solariX

### Acquisition Parameter

|                       |            |                      |           |                           |                          |
|-----------------------|------------|----------------------|-----------|---------------------------|--------------------------|
| Acquisition Mode      | Single MS  | Acquired Scans       | 8         | Calibration Date          | Mon Apr 10 10:10:45 2023 |
| Polarity              | Positive   | No. of Cell Fills    | 1         | Data Acquisition Size     | 1048576                  |
| Broadband Low Mass    | 100.3 m/z  | No. of Laser Shots   | 500       | Data Processing Size (SI) | 2097152                  |
| Broadband High Mass   | 2000.0 m/z | Laser Power          | 20.0 lp   | Apodization               | Full-Sine                |
| Source Accumulation   | 0.000 sec  | Laser Shot Frequency | 0.001 sec |                           |                          |
| Ion Accumulation Time | 0.100 sec  |                      |           |                           |                          |

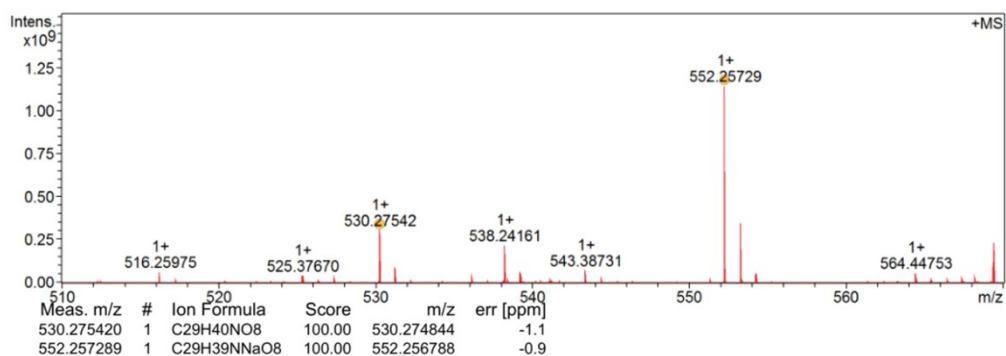

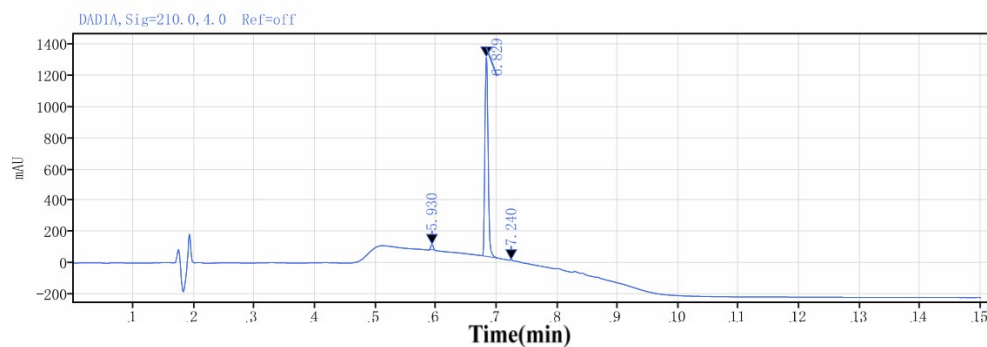

| Retention Time<br>[min] | Type | Peak Width<br>[min] | Peak Area | Peak Height | Peak Area<br>(%) |
|-------------------------|------|---------------------|-----------|-------------|------------------|
| 5.930                   | MM m | 0.08                | 87.32     | 33.39       | 1.86             |
| 6.829                   | MM m | 0.26                | 4608.87   | 1278.94     | 98.04            |
| 7.240                   | MM m | 0.05                | 4.67      | 2.70        | 0.10             |

**Figure S6.  $^1\text{H}$  NMR,  $^{13}\text{C}$  NMR, FT-MS, HPLC of A6**

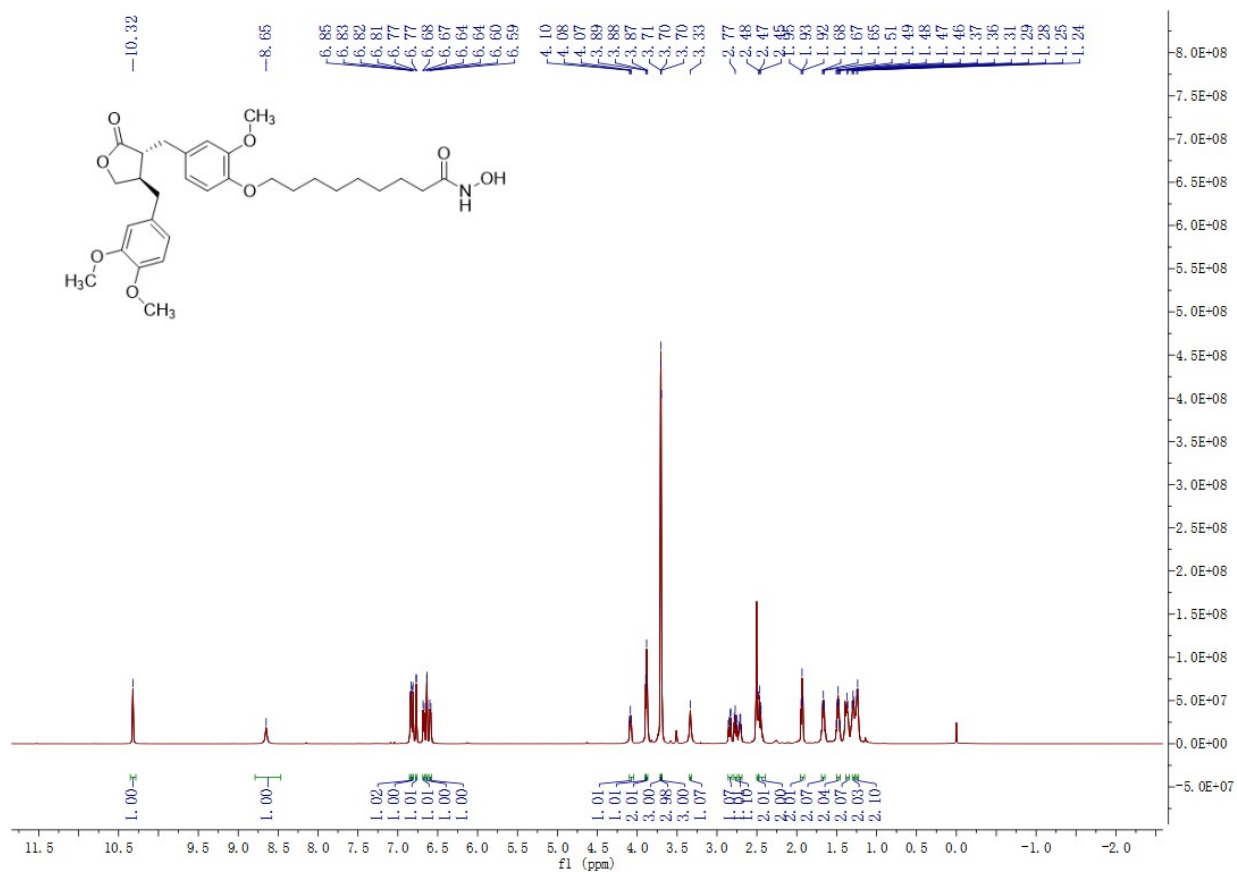

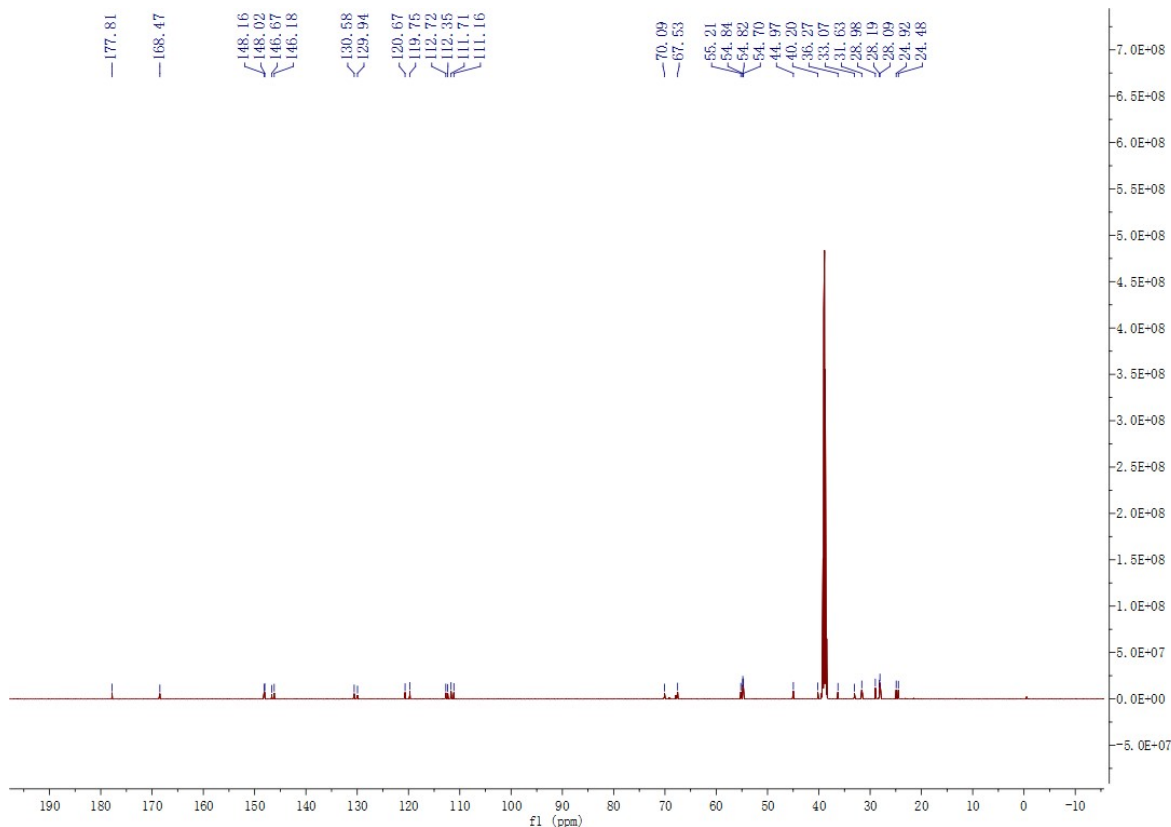

## Mass Spectrum SmartFormula Report

### Analysis Info

Analysis Name D:\data\Sample Detection\20230524\A6 pos\_000002.d  
 Method 20230410 pos 100-2000  
 Sample Name  
 Comment

Acquisition Date 5/24/2023 12:51:47 PM

Operator  
 Instrument solariX

### Acquisition Parameter

|                       |            |                      |           |                           |                          |
|-----------------------|------------|----------------------|-----------|---------------------------|--------------------------|
| Acquisition Mode      | Single MS  | Acquired Scans       | 8         | Calibration Date          | Mon Apr 10 10:10:45 2023 |
| Polarity              | Positive   | No. of Cell Fills    | 1         | Data Acquisition Size     | 1048576                  |
| Broadband Low Mass    | 100.3 m/z  | No. of Laser Shots   | 500       | Data Processing Size (SI) | 2097152                  |
| Broadband High Mass   | 2000.0 m/z | Laser Power          | 20.0 lp   | Apodization               | Full-Sine                |
| Source Accumulation   | 0.000 sec  | Laser Shot Frequency | 0.001 sec |                           |                          |
| Ion Accumulation Time | 0.100 sec  |                      |           |                           |                          |

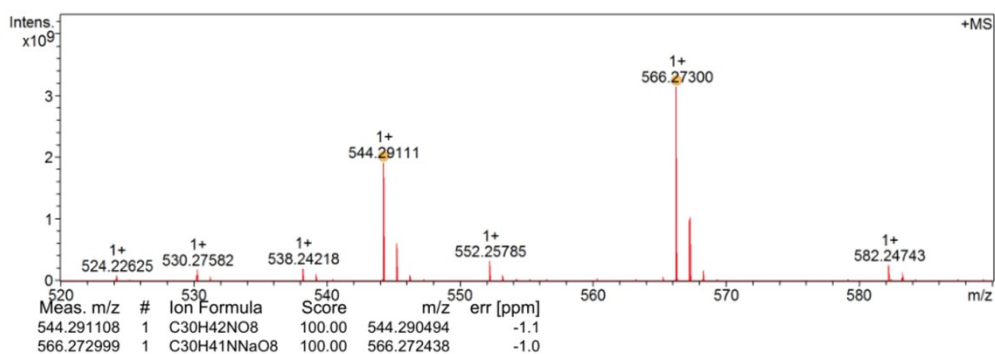

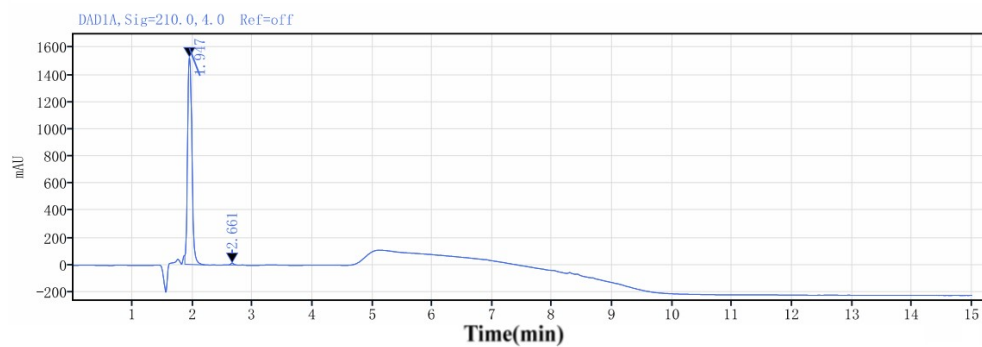

| Retention Time [min] | Type | Peak Width [min] | Peak Area | Peak Height | Peak Area (%) |
|----------------------|------|------------------|-----------|-------------|---------------|
| 1.947                | MM m | 0.34             | 7795.63   | 1523.80     | 99.45         |
| 2.661                | MM m | 0.11             | 43.48     | 12.86       | 0.55          |

**Figure S7.  $^1\text{H}$  NMR,  $^{13}\text{C}$  NMR, FT-MS, HPLC of A7**

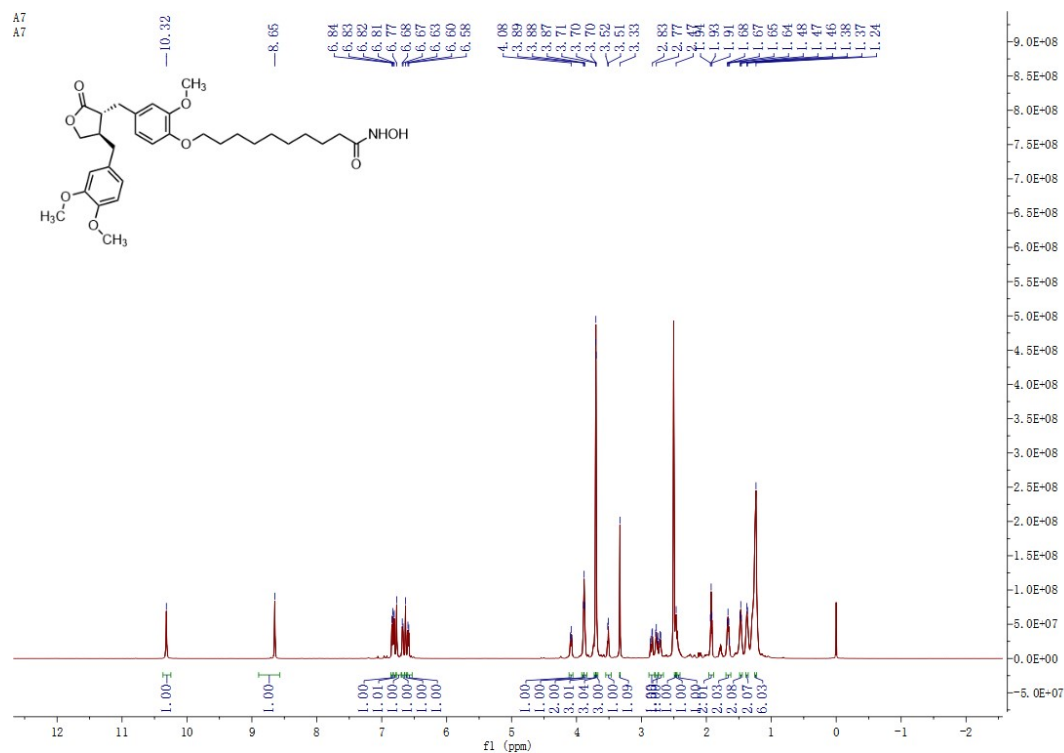

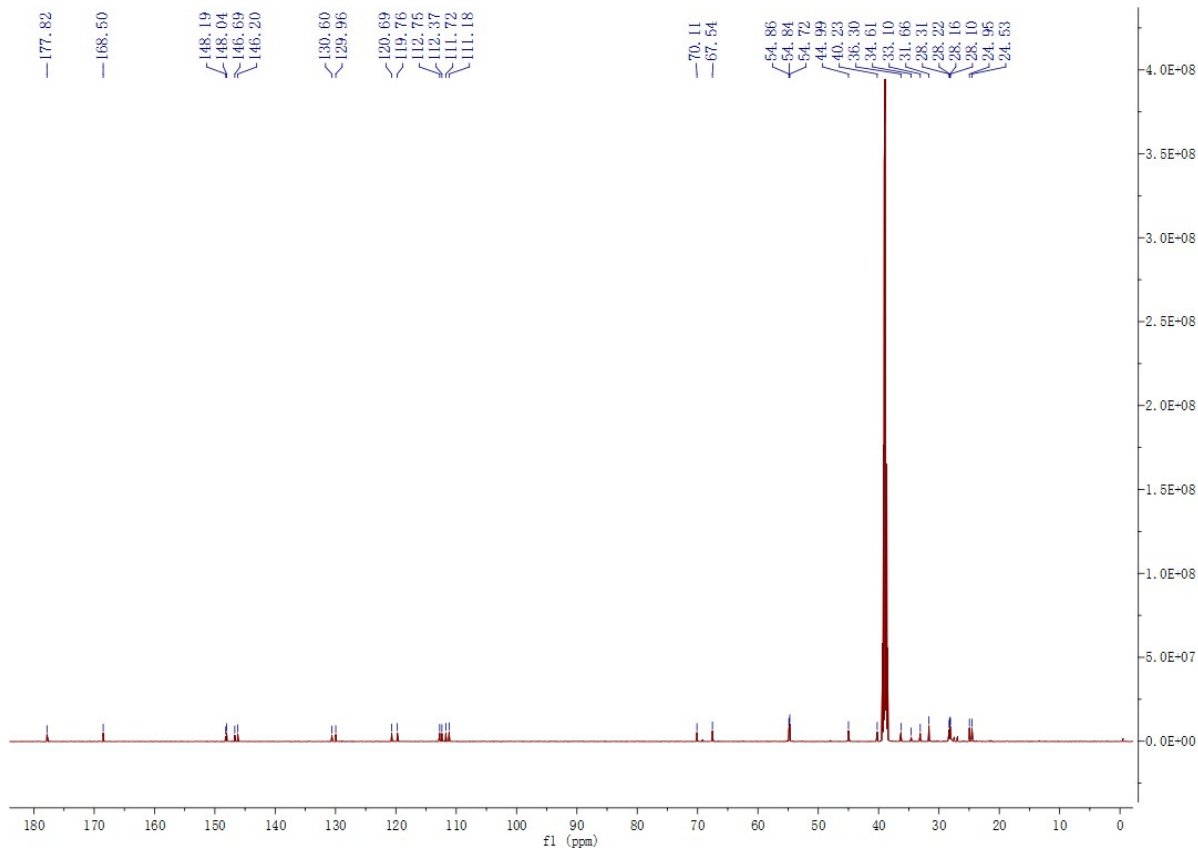

## Mass Spectrum SmartFormula Report

### Analysis Info

Analysis Name D:\data\Sample Detection\20230524\A7 pos\_000002.d  
 Method 20230410 pos 100-2000  
 Sample Name  
 Comment

Acquisition Date 5/24/2023 1:02:16 PM

Operator  
 Instrument solariX

### Acquisition Parameter

|                       |            |                      |           |                           |                          |
|-----------------------|------------|----------------------|-----------|---------------------------|--------------------------|
| Acquisition Mode      | Single MS  | Acquired Scans       | 8         | Calibration Date          | Mon Apr 10 10:10:45 2023 |
| Polarity              | Positive   | No. of Cell Fills    | 1         | Data Acquisition Size     | 1048576                  |
| Broadband Low Mass    | 100.3 m/z  | No. of Laser Shots   | 500       | Data Processing Size (SI) | 2097152                  |
| Broadband High Mass   | 2000.0 m/z | Laser Power          | 20.0 lp   | Apodization               | Full-Sine                |
| Source Accumulation   | 0.000 sec  | Laser Shot Frequency | 0.001 sec |                           |                          |
| Ion Accumulation Time | 0.100 sec  |                      |           |                           |                          |

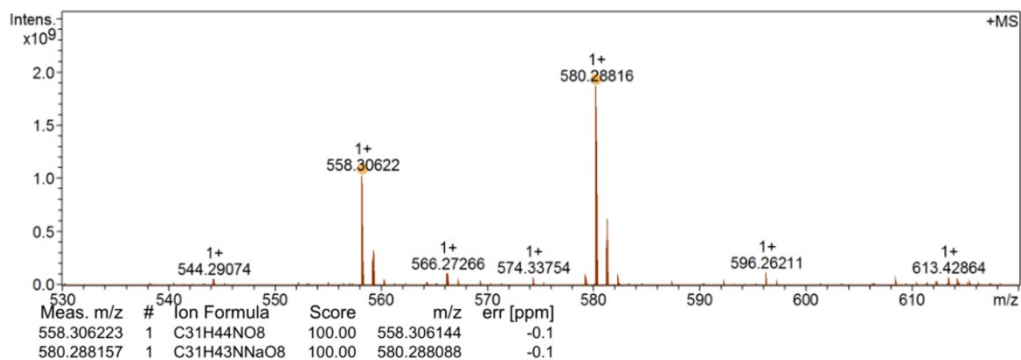

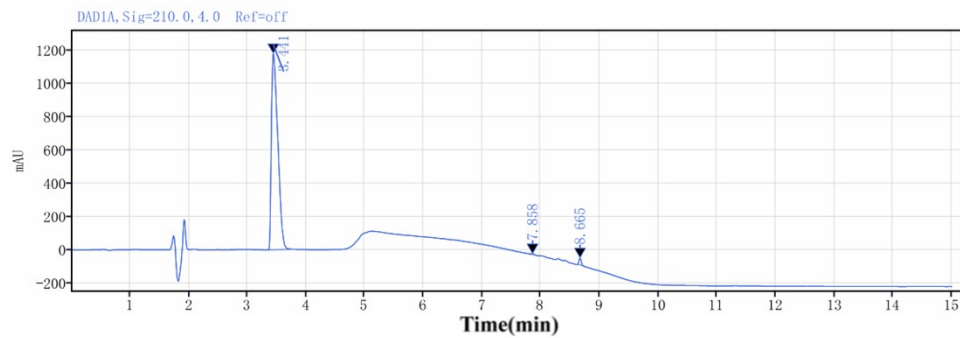

| Retention Time [min] | Type | Peak Width [min] | Peak Area | Peak Height | Peak Area (%) |
|----------------------|------|------------------|-----------|-------------|---------------|
| 3.441                | MM m | 0.49             | 8923.24   | 1181.04     | 98.53         |
| 7.858                | MM m | 0.10             | 14.02     | 4.89        | 0.15          |
| 8.665                | MM m | 0.11             | 118.76    | 41.80       | 1.31          |

**Figure S8.  $^1\text{H}$  NMR,  $^{13}\text{C}$  NMR, FT-MS, HPLC of A8**

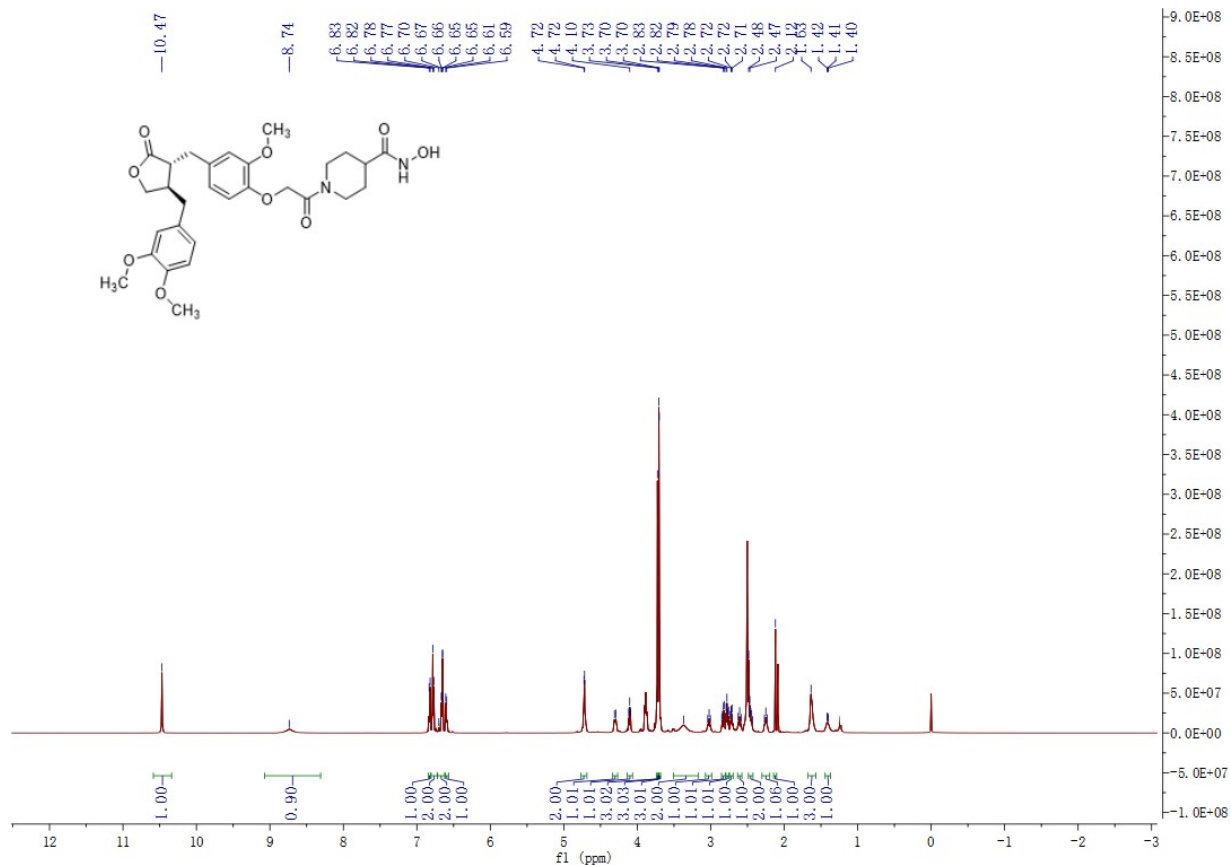

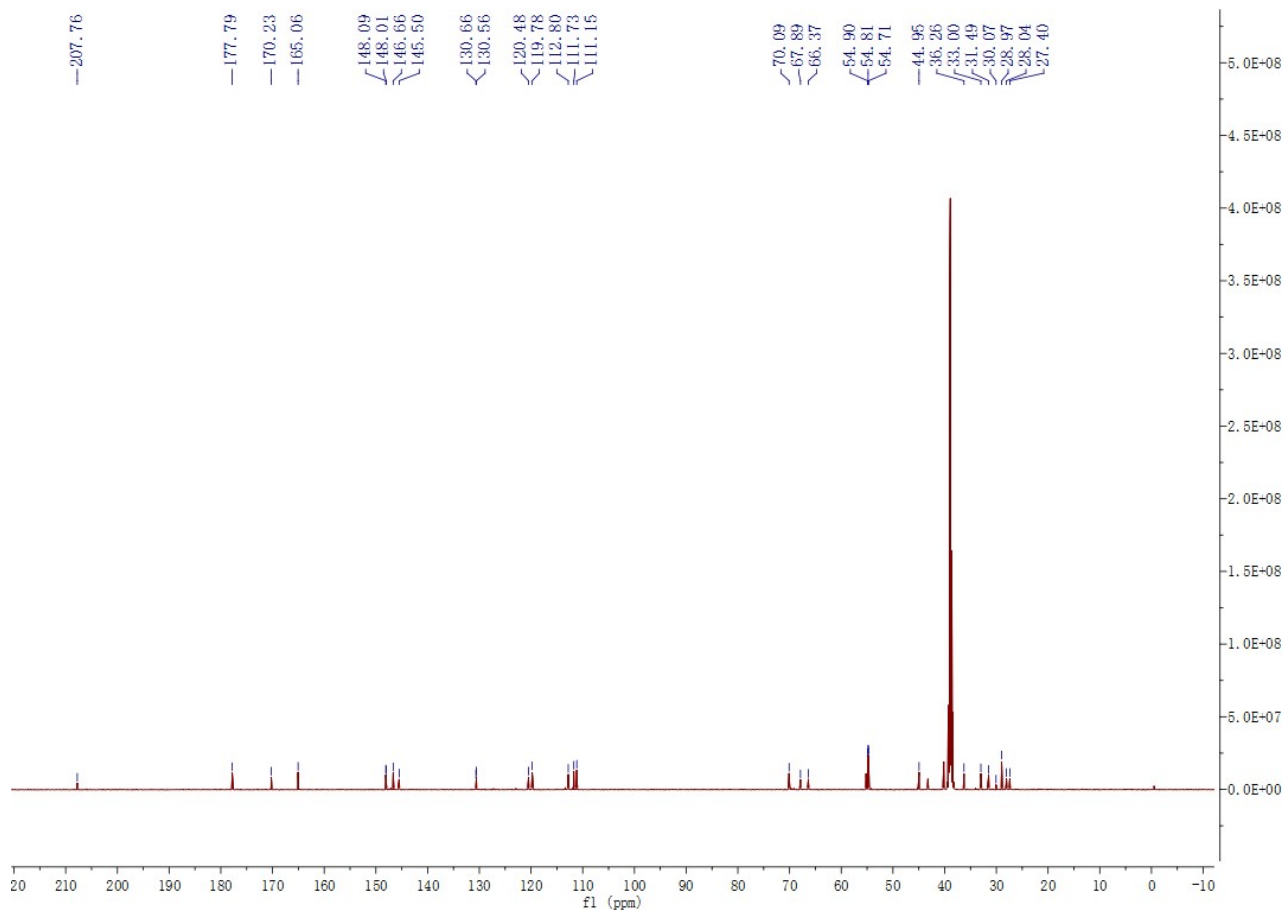

## Mass Spectrum SmartFormula Report

### Analysis Info

Analysis Name D:\data\Sample Detection\20230524\Pai-NHOH pos\_000001.d  
 Method 20230410 pos 100-2000  
 Sample Name  
 Comment

Acquisition Date 5/24/2023 11:57:59 AM

Operator

Instrument solariX

### Acquisition Parameter

|                       |            |                      |           |                           |                          |
|-----------------------|------------|----------------------|-----------|---------------------------|--------------------------|
| Acquisition Mode      | Single MS  | Acquired Scans       | 8         | Calibration Date          | Mon Apr 10 10:10:45 2023 |
| Polarity              | Positive   | No. of Cell Fills    | 1         | Data Acquisition Size     | 1048576                  |
| Broadband Low Mass    | 100.3 m/z  | No. of Laser Shots   | 500       | Data Processing Size (SI) | 2097152                  |
| Broadband High Mass   | 2000.0 m/z | Laser Power          | 20.0 lp   | Apodization               | Full-Sine                |
| Source Accumulation   | 0.000 sec  | Laser Shot Frequency | 0.001 sec |                           |                          |
| Ion Accumulation Time | 0.100 sec  |                      |           |                           |                          |

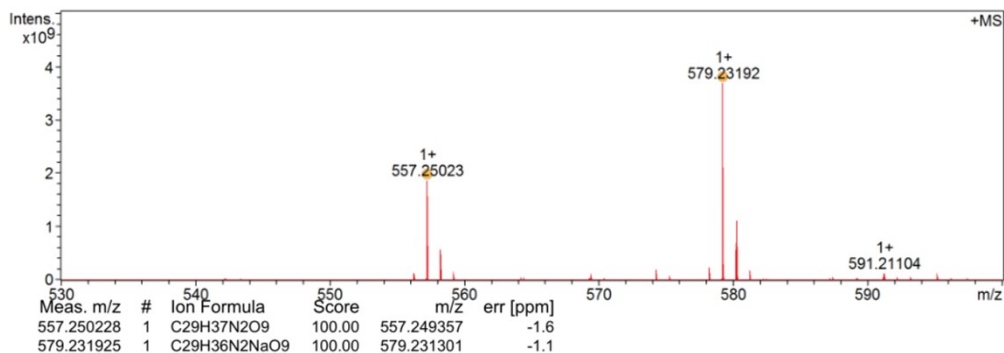



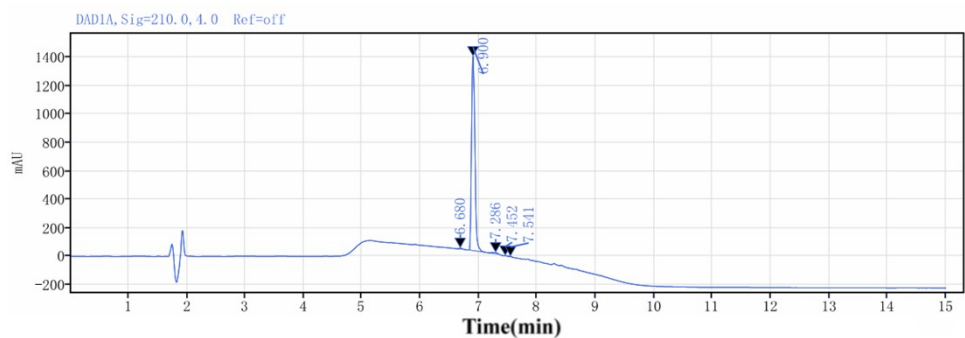

| Retention Time [min] | Type | Peak Width [min] | Peak Area | Peak Height | Peak Area (%) |
|----------------------|------|------------------|-----------|-------------|---------------|
| 6.680                | MM m | 0.08             | 18.46     | 7.08        | 0.33          |
| 6.900                | MM m | 0.28             | 5435.31   | 1367.21     | 98.39         |
| 7.286                | MM m | 0.18             | 55.07     | 9.71        | 1.00          |
| 7.452                | MM m | 0.09             | 5.90      | 1.96        | 0.11          |
| 7.541                | MM m | 0.06             | 9.31      | 3.95        | 0.17          |

**Figure S9.  $^1\text{H}$  NMR,  $^{13}\text{C}$  NMR, FT-MS, HPLC of A9**

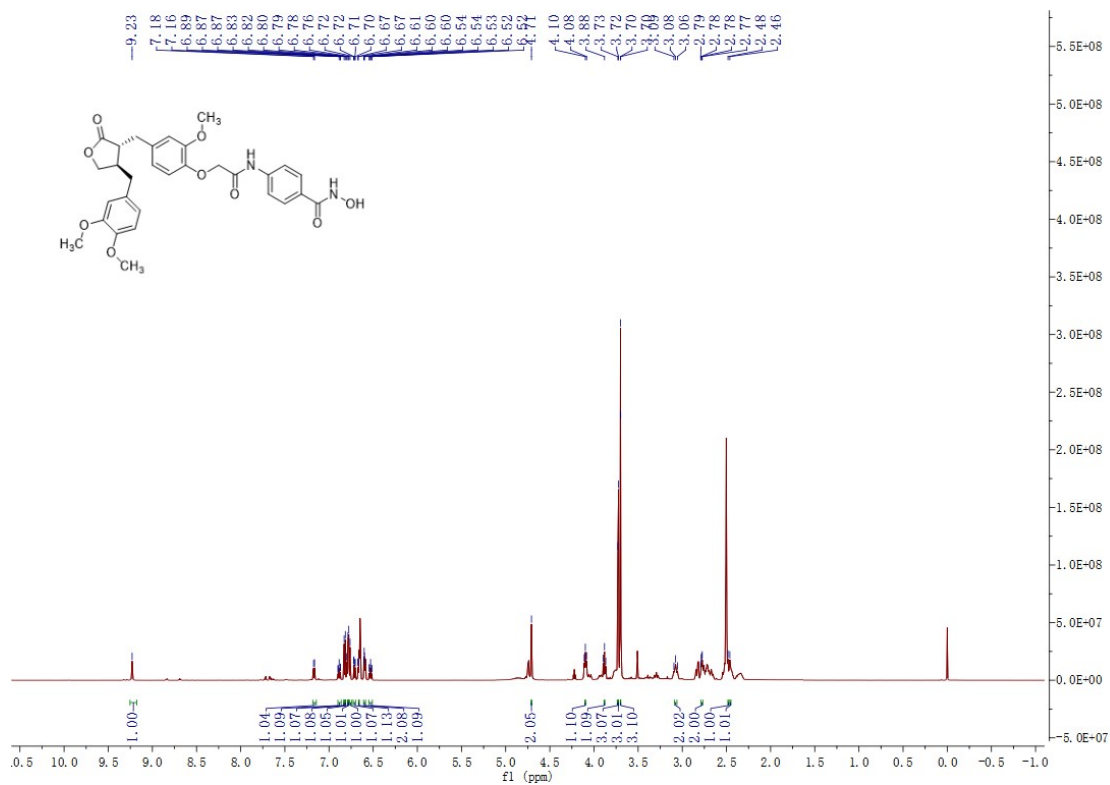

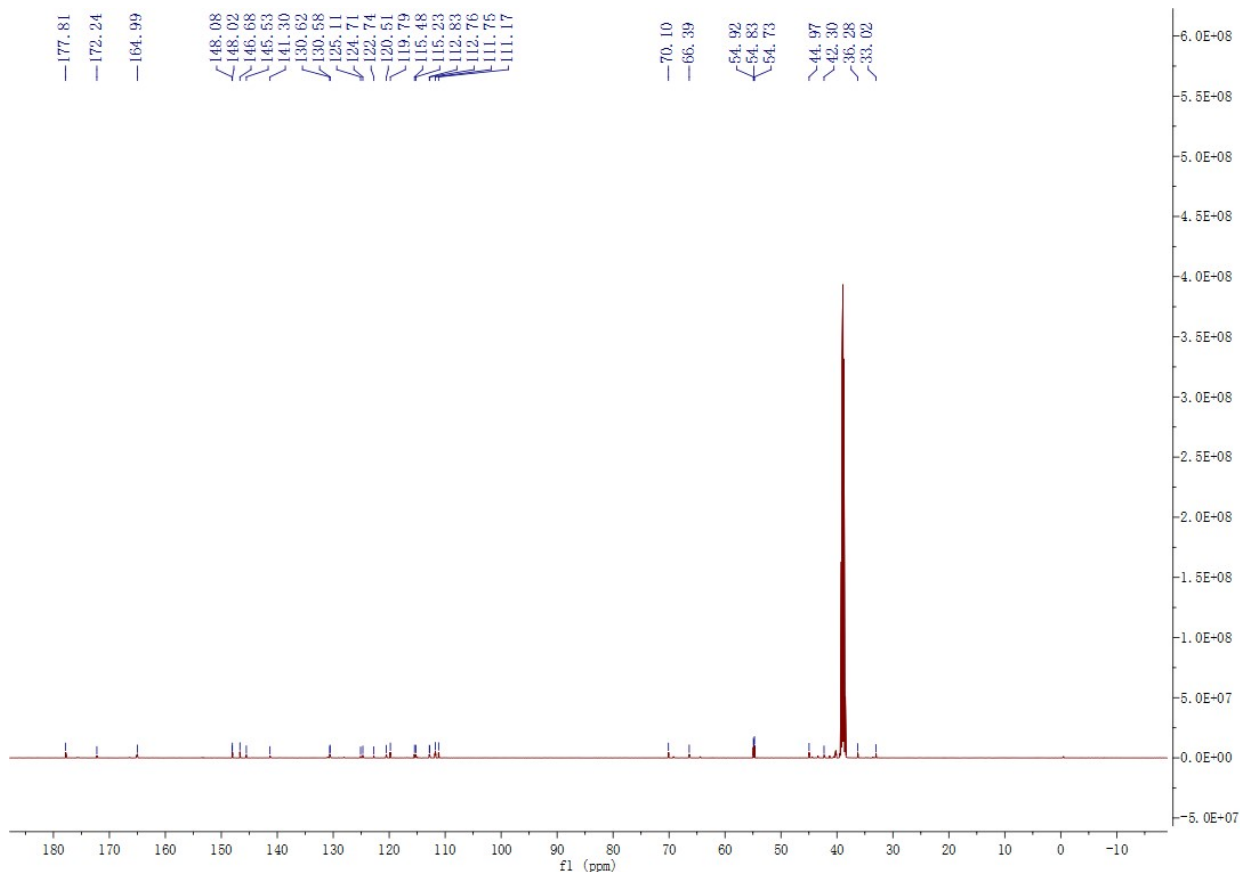

## Mass Spectrum SmartFormula Report

### Analysis Info

Analysis Name D:\data\Sample Detection\20230524\BEN-NHOH pos\_000004.d  
 Method 20230410 pos 100-2000  
 Sample Name  
 Comment

Acquisition Date 5/24/2023 11:54:54 AM

Operator

Instrument solariX

### Acquisition Parameter

|                       |            |                      |           |                           |                          |
|-----------------------|------------|----------------------|-----------|---------------------------|--------------------------|
| Acquisition Mode      | Single MS  | Acquired Scans       | 8         | Calibration Date          | Mon Apr 10 10:10:45 2023 |
| Polarity              | Positive   | No. of Cell Fills    | 1         | Data Acquisition Size     | 1048576                  |
| Broadband Low Mass    | 100.3 m/z  | No. of Laser Shots   | 500       | Data Processing Size (SI) | 2097152                  |
| Broadband High Mass   | 2000.0 m/z | Laser Power          | 20.0 lp   | Apodization               | Full-Sine                |
| Source Accumulation   | 0.000 sec  | Laser Shot Frequency | 0.001 sec |                           |                          |
| Ion Accumulation Time | 0.100 sec  |                      |           |                           |                          |

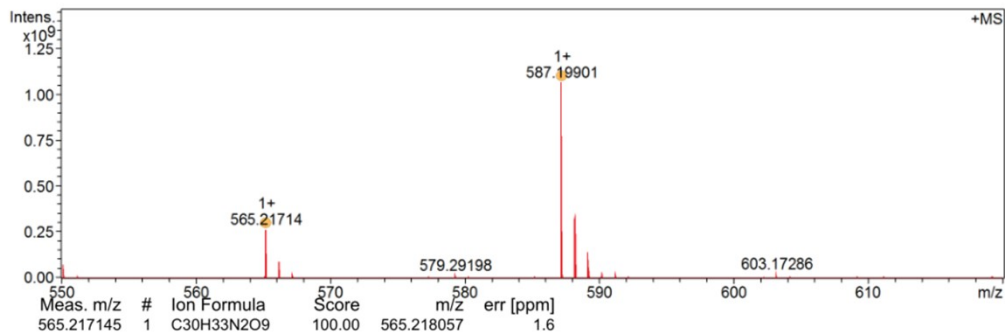

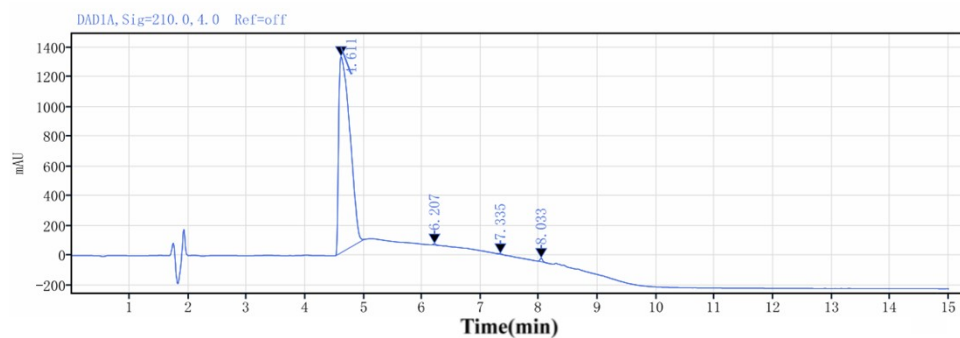

| Retention Time<br>[min] | Type | Peak Width<br>[min] | Peak Area | Peak Height | Peak Area<br>(%) |
|-------------------------|------|---------------------|-----------|-------------|------------------|
| 4.611                   | MM m | 0.49                | 17270.62  | 1316.90     | 99.32            |
| 6.207                   | MM m | 0.12                | 24.90     | 8.68        | 0.14             |
| 7.335                   | MM m | 0.17                | 14.00     | 4.68        | 0.08             |
| 8.033                   | MM m | 0.20                | 79.61     | 24.50       | 0.46             |

**Figure S10.  $^1\text{H}$  NMR,  $^{13}\text{C}$  NMR, FT-MS, HPLC of A10**

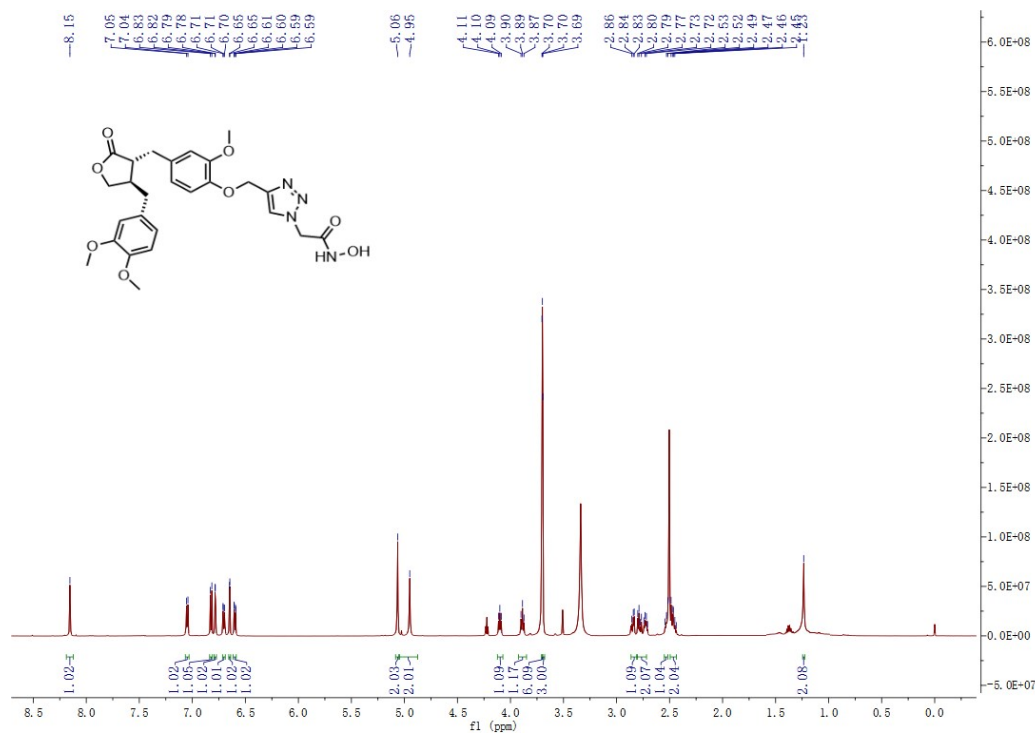

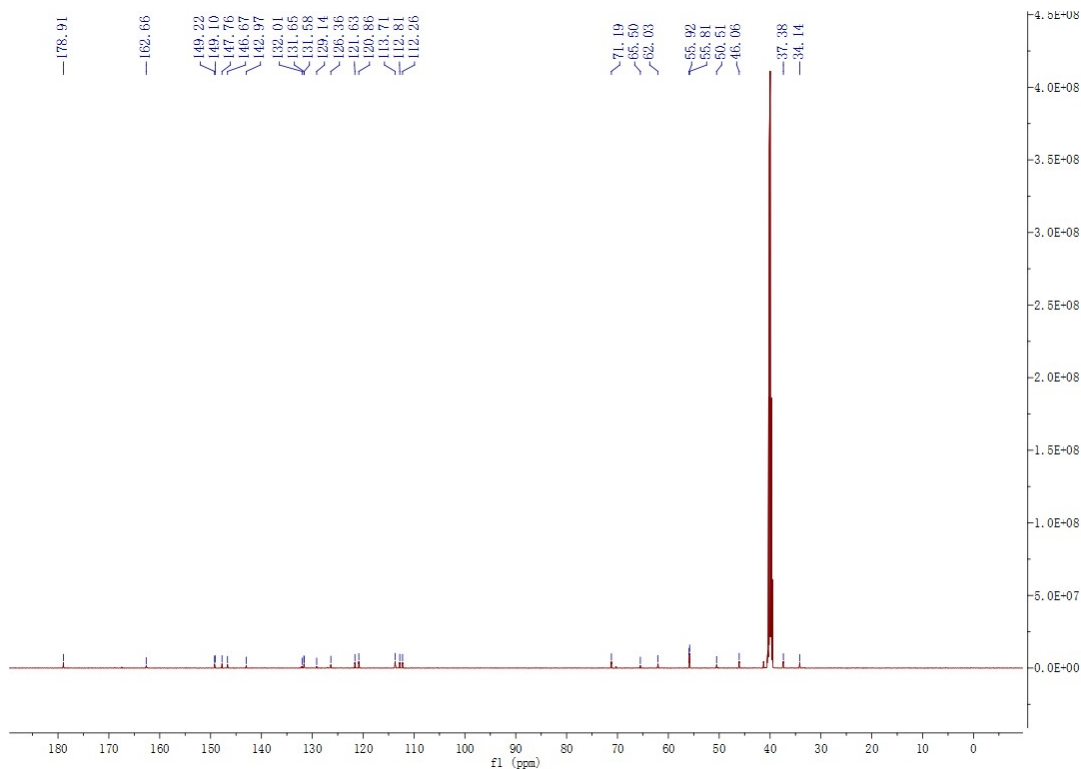

## Mass Spectrum SmartFormula Report

### Analysis Info

Analysis Name D:\data\Sample Detection\20230524\TRI-NHOH pos\_000004.d  
 Method 20230410 pos 100-2000  
 Sample Name  
 Comment

Acquisition Date 5/24/2023 11:42:45 AM

Operator

Instrument solariX

### Acquisition Parameter

Acquisition Mode Single MS  
 Polarity Positive  
 Broadband Low Mass 100.3 m/z  
 Broadband High Mass 2000.0 m/z  
 Source Accumulation 0.000 sec  
 Ion Accumulation Time 0.100 sec

Acquired Scans 8  
 No. of Cell Fills 1  
 No. of Laser Shots 500  
 Laser Power 20.0 Ip  
 Laser Shot Frequency 0.001 sec

Calibration Date Mon Apr 10 10:10:45 2023  
 Data Acquisition Size 1048576  
 Data Processing Size (SI) 2097152  
 Apodization Full-Sine

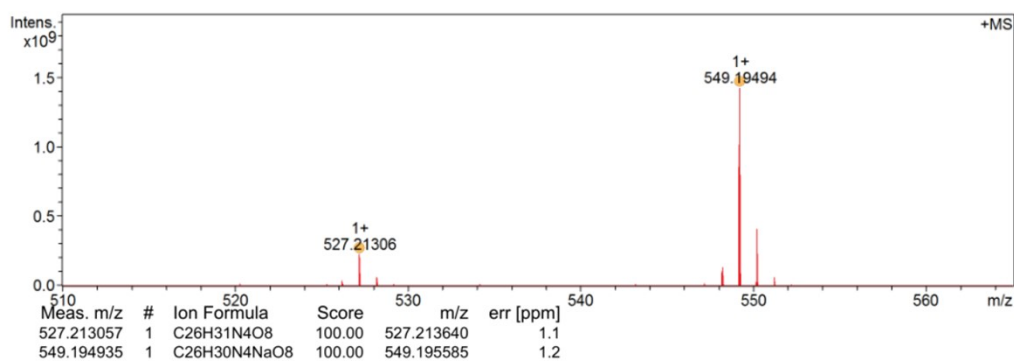

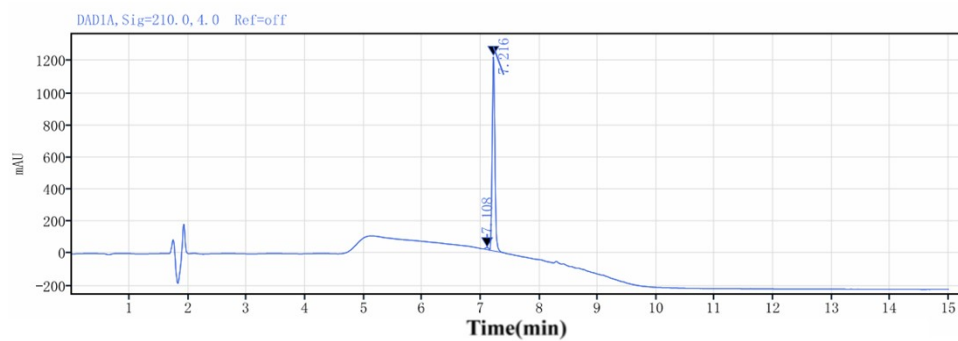

| Retention Time [min] | Type | Peak Width [min] | Peak Area | Peak Height | Peak Area (%) |
|----------------------|------|------------------|-----------|-------------|---------------|
| 7.108                | MM m | 0.12             | 52.88     | 14.66       | 1.31          |
| 7.216                | MM m | 0.23             | 3968.63   | 1215.97     | 98.69         |

**Figure S11.  $^1\text{H}$  NMR,  $^{13}\text{C}$  NMR, FT-MS, HPLC of B1**

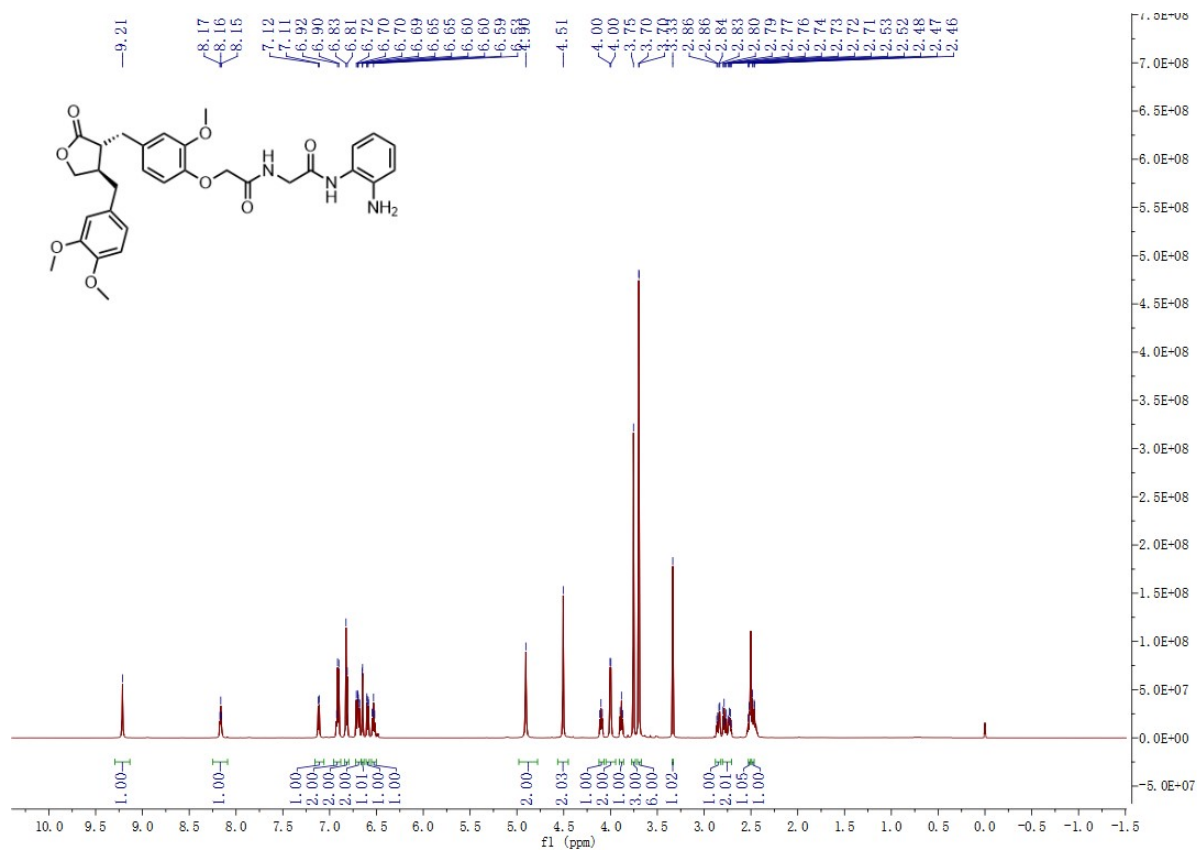

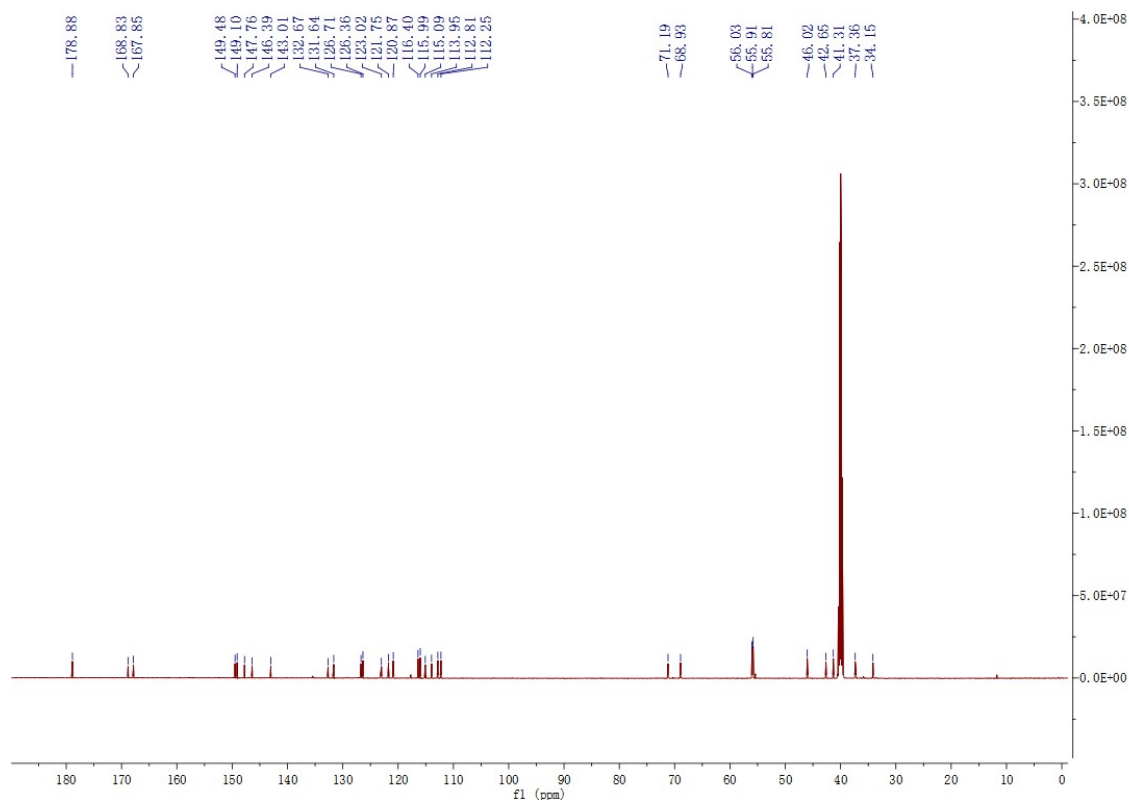

## Mass Spectrum SmartFormula Report

### Analysis Info

Analysis Name D:\data\Sample Detection\20230511\1C-Ben pos\_000008.d  
 Method 20230410 pos 100-2000  
 Sample Name  
 Comment

Acquisition Date 5/11/2023 2:18:42 PM

Operator

Instrument solariX

### Acquisition Parameter

|                       |            |                      |           |                           |                          |
|-----------------------|------------|----------------------|-----------|---------------------------|--------------------------|
| Acquisition Mode      | Single MS  | Acquired Scans       | 8         | Calibration Date          | Mon Apr 10 10:10:45 2023 |
| Polarity              | Positive   | No. of Cell Fills    | 1         | Data Acquisition Size     | 1048576                  |
| Broadband Low Mass    | 100.3 m/z  | No. of Laser Shots   | 500       | Data Processing Size (SI) | 2097152                  |
| Broadband High Mass   | 2000.0 m/z | Laser Power          | 20.0 lp   | Apodization               | Full-Sine                |
| Source Accumulation   | 0.000 sec  | Laser Shot Frequency | 0.001 sec |                           |                          |
| Ion Accumulation Time | 0.100 sec  |                      |           |                           |                          |

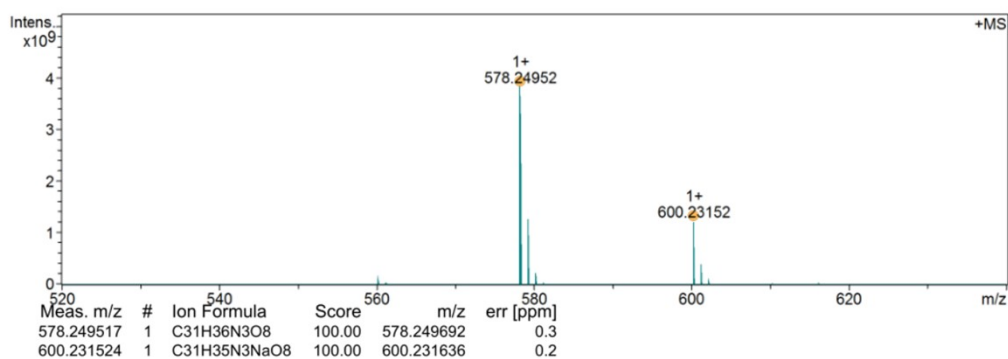

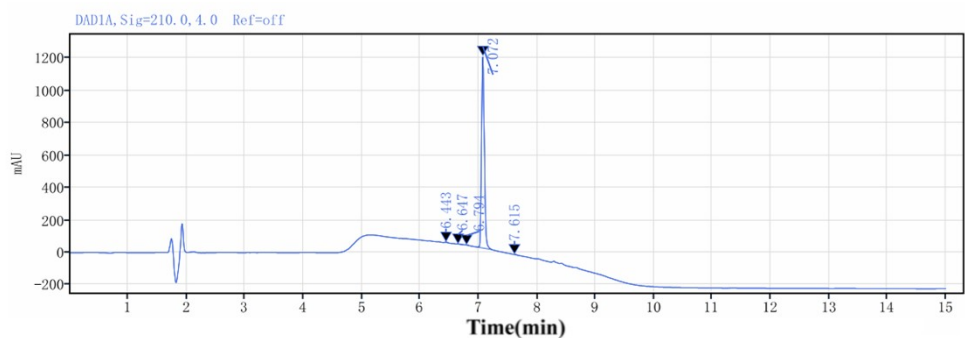

| Retention Time [min] | Type | Peak Width [min] | Peak Area | Peak Height | Peak Area (%) |
|----------------------|------|------------------|-----------|-------------|---------------|
| 6.443                | MM m | 0.07             | 12.97     | 5.27        | 0.32          |
| 6.647                | MM m | 0.10             | 4.77      | 1.56        | 0.12          |
| 6.794                | MM m | 0.11             | 8.75      | 2.86        | 0.22          |
| 7.072                | MM m | 0.25             | 4035.96   | 1184.11     | 99.22         |
| 7.615                | MM m | 0.07             | 5.19      | 1.65        | 0.13          |

**Figure S12.  $^1\text{H}$  NMR,  $^{13}\text{C}$  NMR, FT-MS, HPLC of B2**

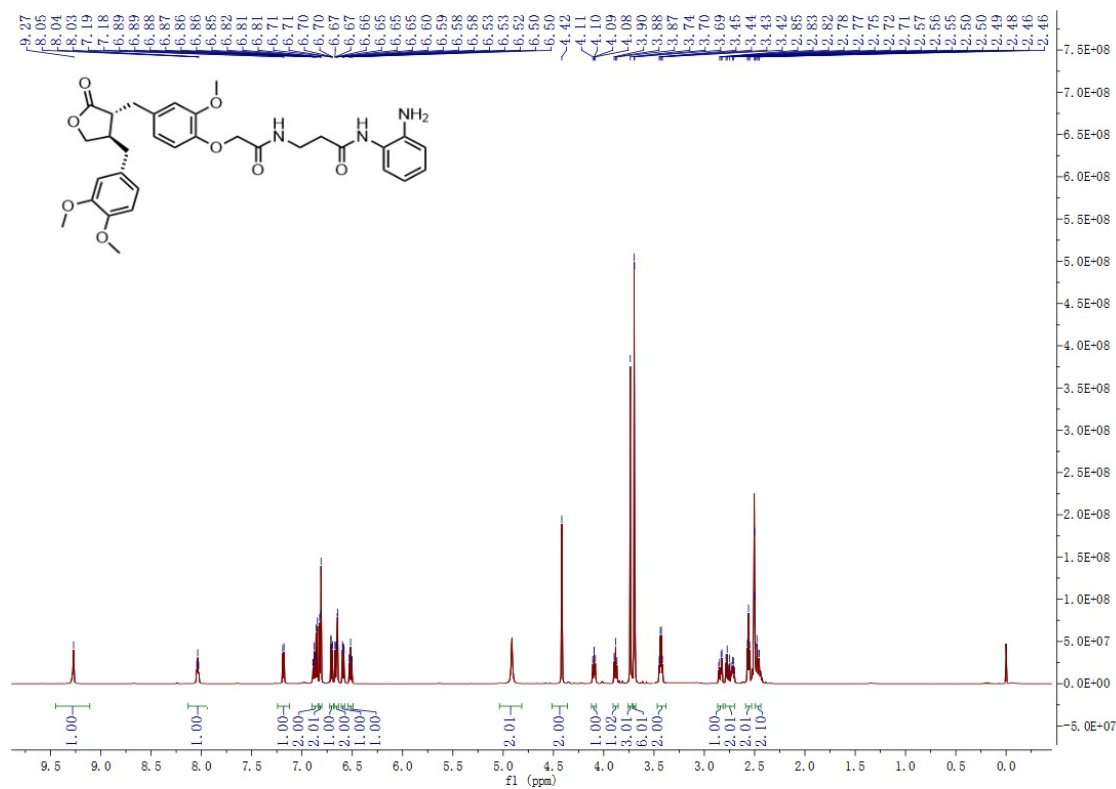

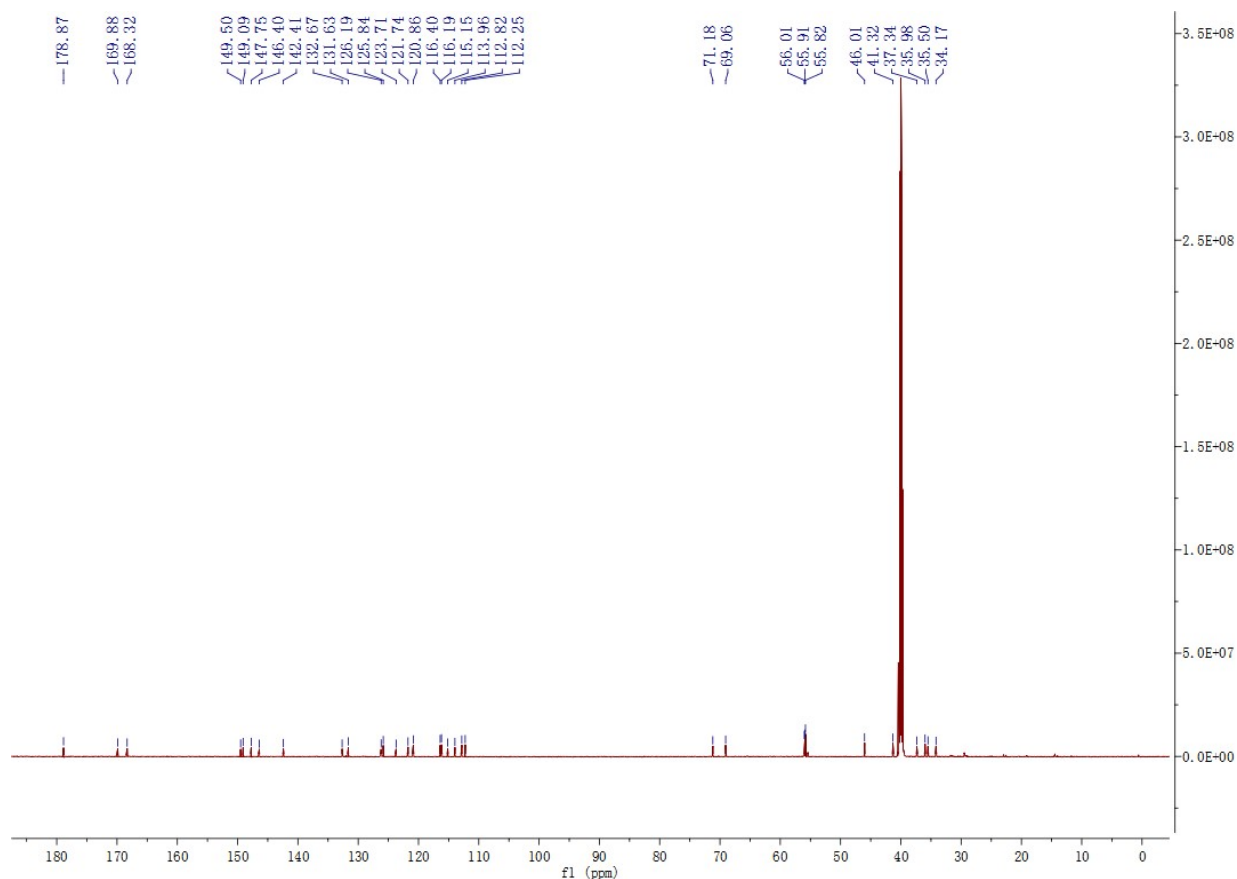

## Mass Spectrum SmartFormula Report

### Analysis Info

Analysis Name D:\data\Sample Detection\20230524\2C-Ben pos\_000002.d  
 Method 20230410 pos 100-2000  
 Sample Name  
 Comment

Acquisition Date 5/24/2023 1:31:14 PM

Operator  
 Instrument solariX

### Acquisition Parameter

|                       |            |                      |           |                           |                          |
|-----------------------|------------|----------------------|-----------|---------------------------|--------------------------|
| Acquisition Mode      | Single MS  | Acquired Scans       | 8         | Calibration Date          | Mon Apr 10 10:10:45 2023 |
| Polarity              | Positive   | No. of Cell Fills    | 1         | Data Acquisition Size     | 1048576                  |
| Broadband Low Mass    | 100.3 m/z  | No. of Laser Shots   | 500       | Data Processing Size (SI) | 2097152                  |
| Broadband High Mass   | 2000.0 m/z | Laser Power          | 20.0 Ip   | Apodization               | Full-Sine                |
| Source Accumulation   | 0.000 sec  | Laser Shot Frequency | 0.001 sec |                           |                          |
| Ion Accumulation Time | 0.100 sec  |                      |           |                           |                          |

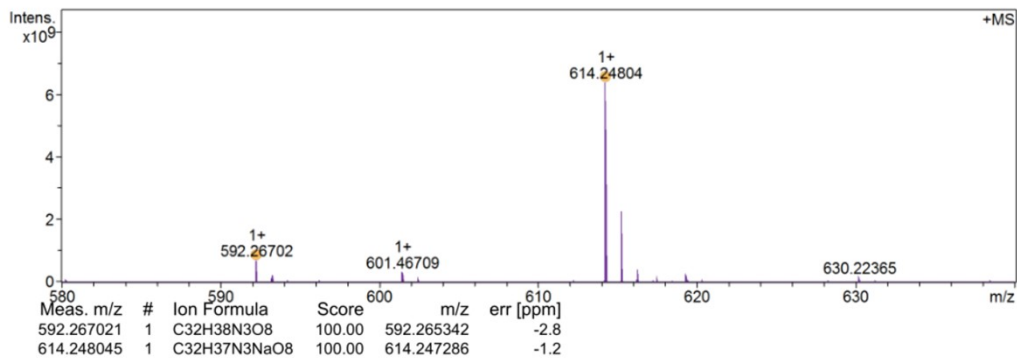



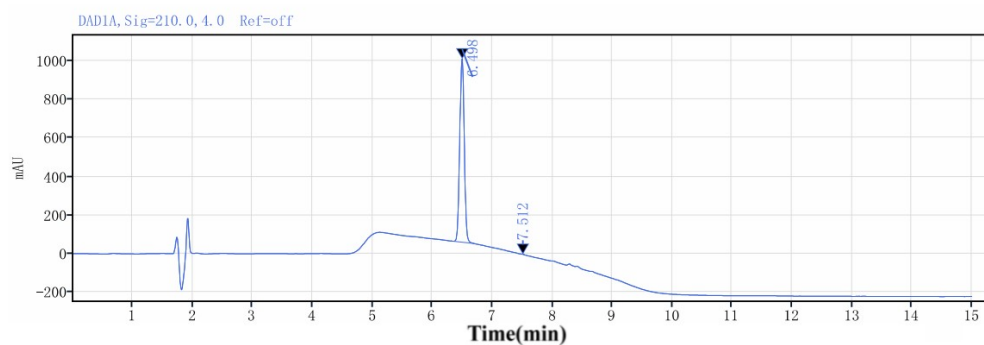

| Retention Time [min] | Type | Peak Width [min] | Peak Area | Peak Height | Peak Area (%) |
|----------------------|------|------------------|-----------|-------------|---------------|
| 6.498                | MM m | 0.39             | 5007.68   | 951.69      | 99.89         |
| 7.512                | MM m | 0.08             | 5.53      | 2.17        | 0.11          |

**Figure S13.  $^1\text{H}$  NMR,  $^{13}\text{C}$  NMR, FT-MS, HPLC of B3**

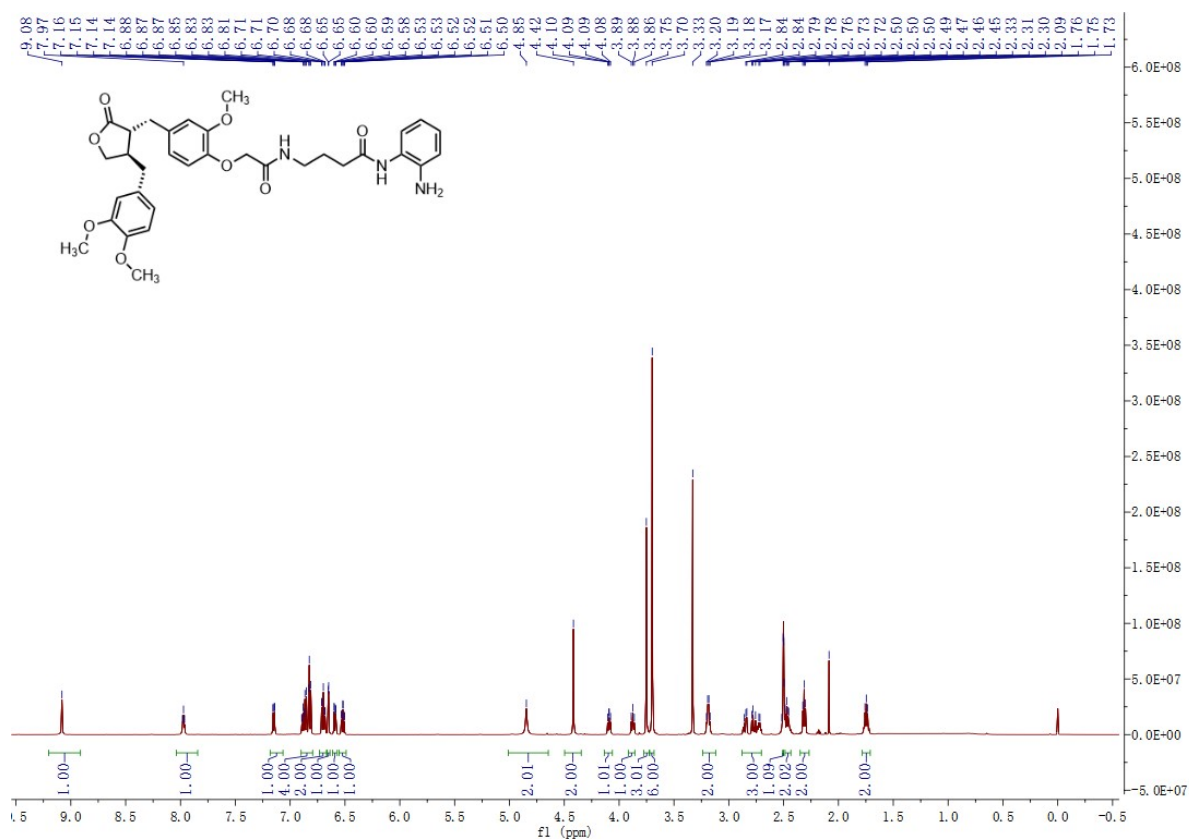

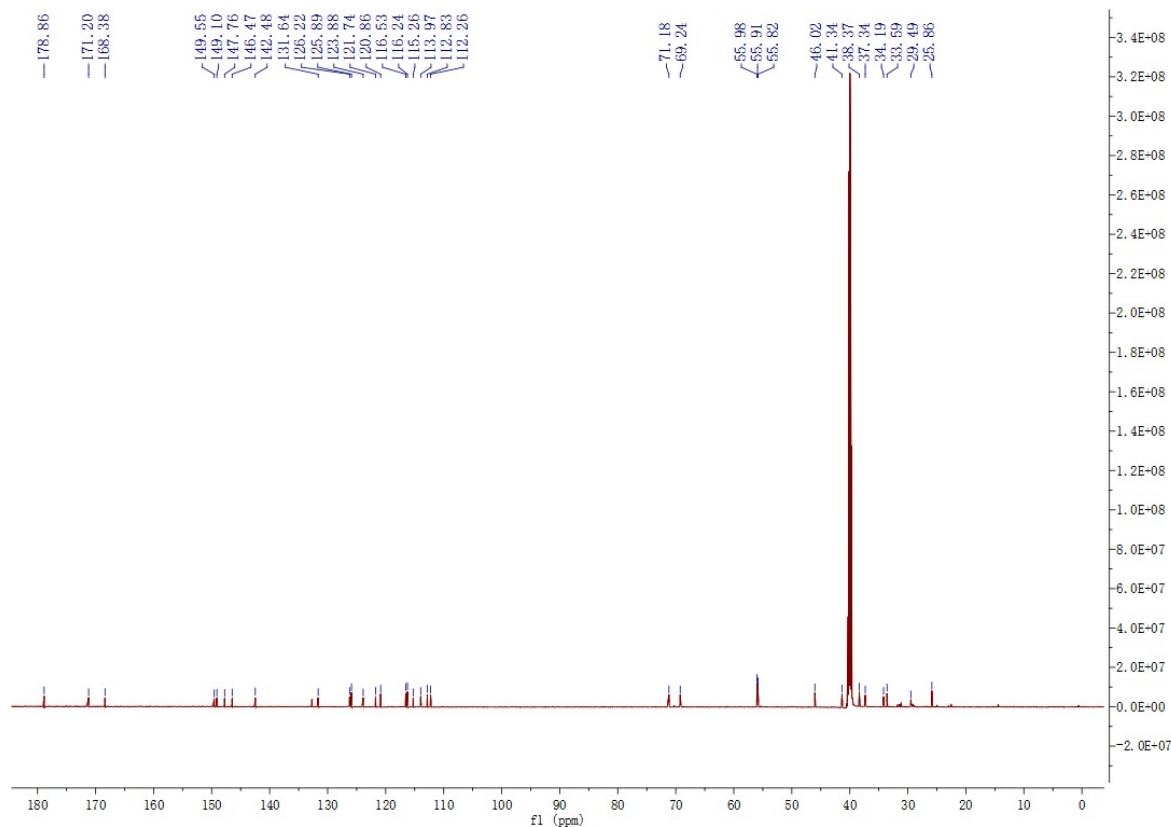

## Mass Spectrum SmartFormula Report

### Analysis Info

Analysis Name D:\data\Sample Detection\20230524\3C-Ben pos\_000001.d  
 Method 20230410 pos 100-2000  
 Sample Name  
 Comment

Acquisition Date 5/24/2023 1:47:49 PM

Operator

Instrument solariX

### Acquisition Parameter

|                       |            |                      |           |                           |                          |
|-----------------------|------------|----------------------|-----------|---------------------------|--------------------------|
| Acquisition Mode      | Single MS  | Acquired Scans       | 7         | Calibration Date          | Mon Apr 10 10:10:45 2023 |
| Polarity              | Positive   | No. of Cell Fills    | 1         | Data Acquisition Size     | 1048576                  |
| Broadband Low Mass    | 100.3 m/z  | No. of Laser Shots   | 500       | Data Processing Size (SI) | 2097152                  |
| Broadband High Mass   | 2000.0 m/z | Laser Power          | 20.0 lp   | Apodization               | Full-Sine                |
| Source Accumulation   | 0.000 sec  | Laser Shot Frequency | 0.001 sec |                           |                          |
| Ion Accumulation Time | 0.100 sec  |                      |           |                           |                          |

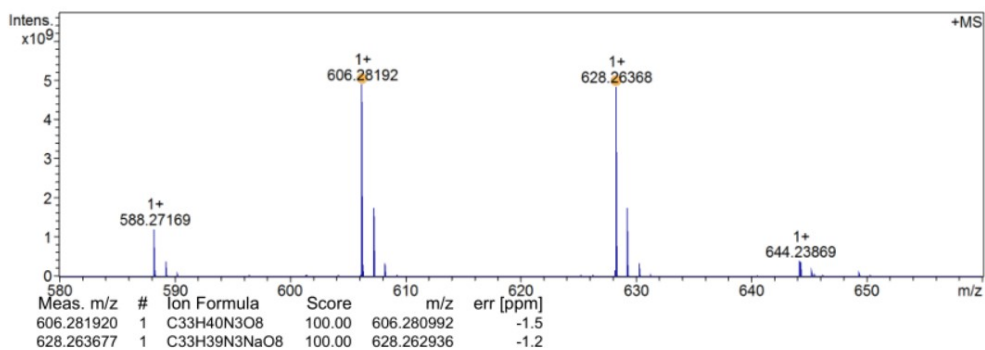

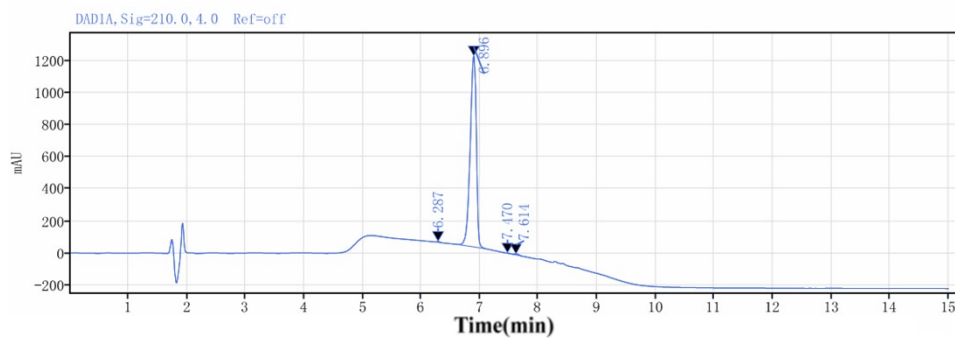

| Retention Time [min] | Type | Peak Width [min] | Peak Area | Peak Height | Peak Area (%) |
|----------------------|------|------------------|-----------|-------------|---------------|
| 6.287                | MM m | 0.13             | 18.44     | 5.87        | 0.21          |
| 6.896                | MM m | 0.51             | 8680.96   | 1193.34     | 99.42         |
| 7.470                | MM m | 0.10             | 3.76      | 1.36        | 0.04          |
| 7.614                | MM m | 0.15             | 28.49     | 5.00        | 0.33          |

**Figure S14.  $^1\text{H}$  NMR,  $^{13}\text{C}$  NMR, FT-MS, HPLC of B4**

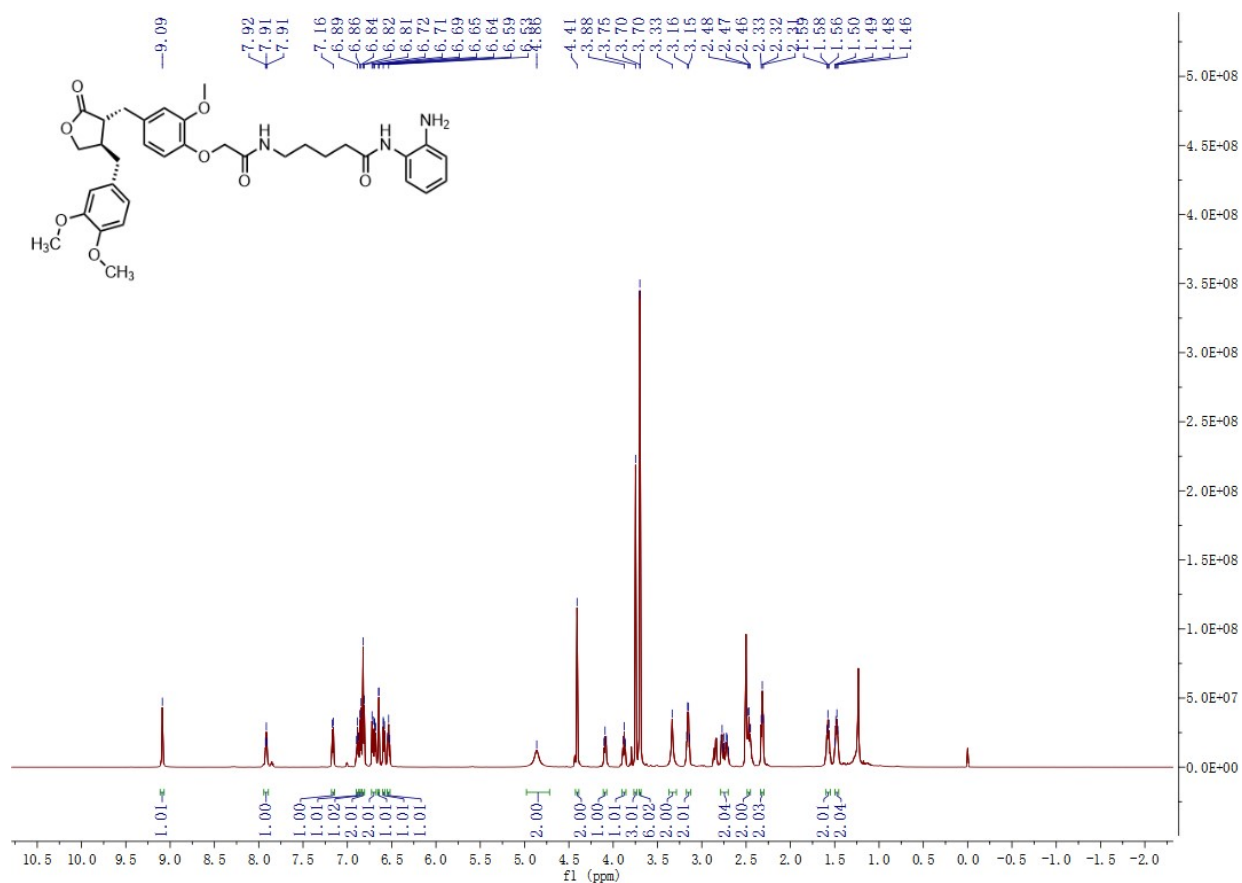

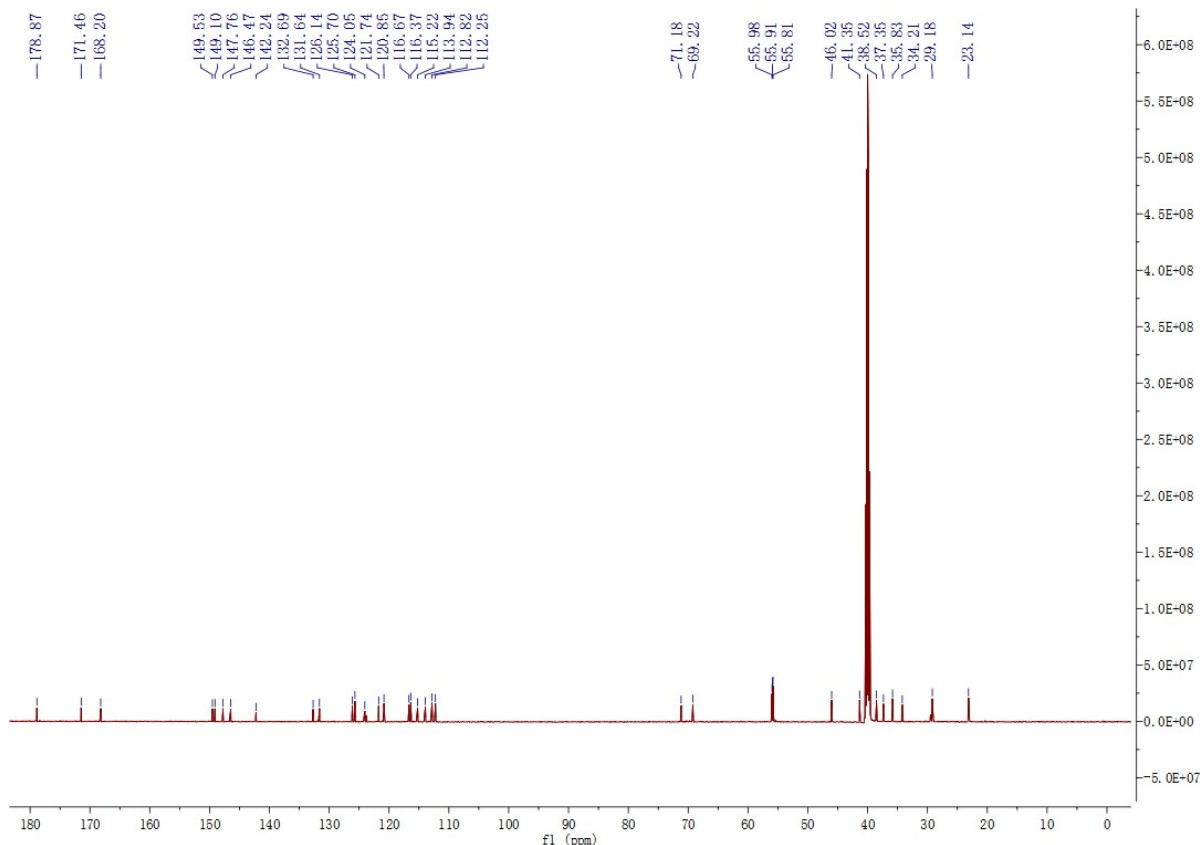

## Mass Spectrum SmartFormula Report

### Analysis Info

Analysis Name D:\data\Sample Detection\20230524\4C-Ben pos\_000005.d  
 Method 20230410 pos 100-2000  
 Sample Name  
 Comment

Acquisition Date 5/24/2023 2:01:27 PM

Operator  
 Instrument solariX

### Acquisition Parameter

|                       |            |                      |           |                           |                          |
|-----------------------|------------|----------------------|-----------|---------------------------|--------------------------|
| Acquisition Mode      | Single MS  | Acquired Scans       | 8         | Calibration Date          | Mon Apr 10 10:10:45 2023 |
| Polarity              | Positive   | No. of Cell Fills    | 1         | Data Acquisition Size     | 1048576                  |
| Broadband Low Mass    | 100.3 m/z  | No. of Laser Shots   | 500       | Data Processing Size (SI) | 2097152                  |
| Broadband High Mass   | 2000.0 m/z | Laser Power          | 20.0 lp   | Apodization               | Full-Sine                |
| Source Accumulation   | 0.000 sec  | Laser Shot Frequency | 0.001 sec |                           |                          |
| Ion Accumulation Time | 0.100 sec  |                      |           |                           |                          |

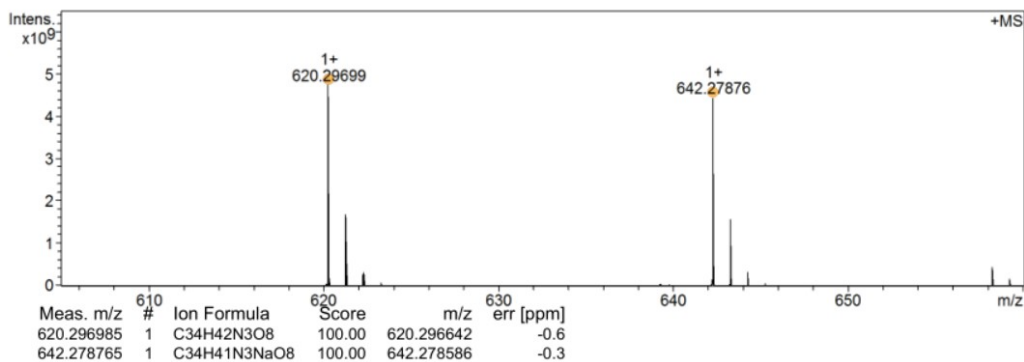

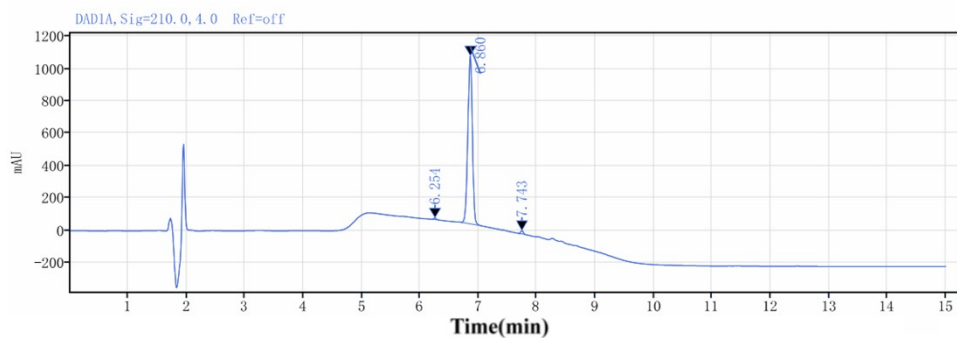

| Retention Time [min] | Type | Peak Width [min] | Peak Area | Peak Height | Peak Area (%) |
|----------------------|------|------------------|-----------|-------------|---------------|
| 6.254                | MM m | 0.10             | 27.13     | 9.56        | 0.48          |
| 6.860                | MM m | 0.36             | 5579.25   | 1036.14     | 98.44         |
| 7.743                | MM m | 0.12             | 61.54     | 20.46       | 1.09          |

**Figure S15.  $^1\text{H}$  NMR,  $^{13}\text{C}$  NMR, FT-MS, HPLC of B5**

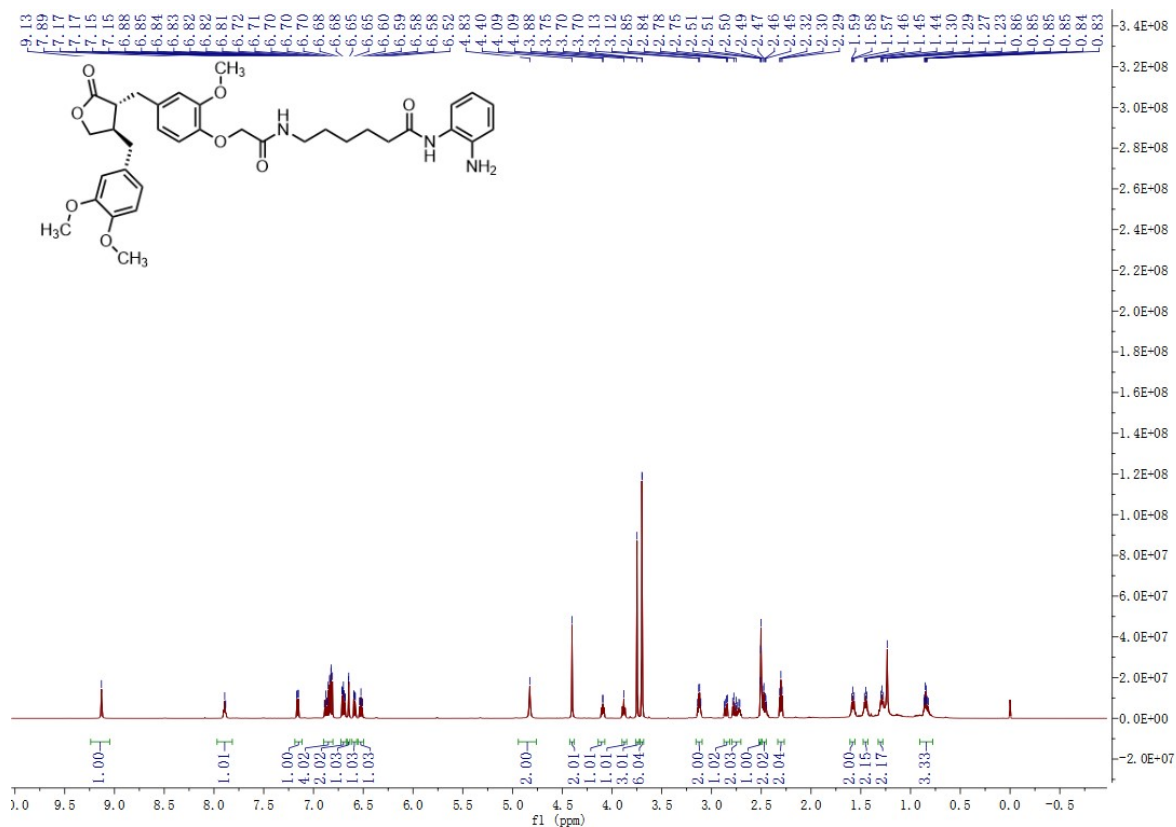

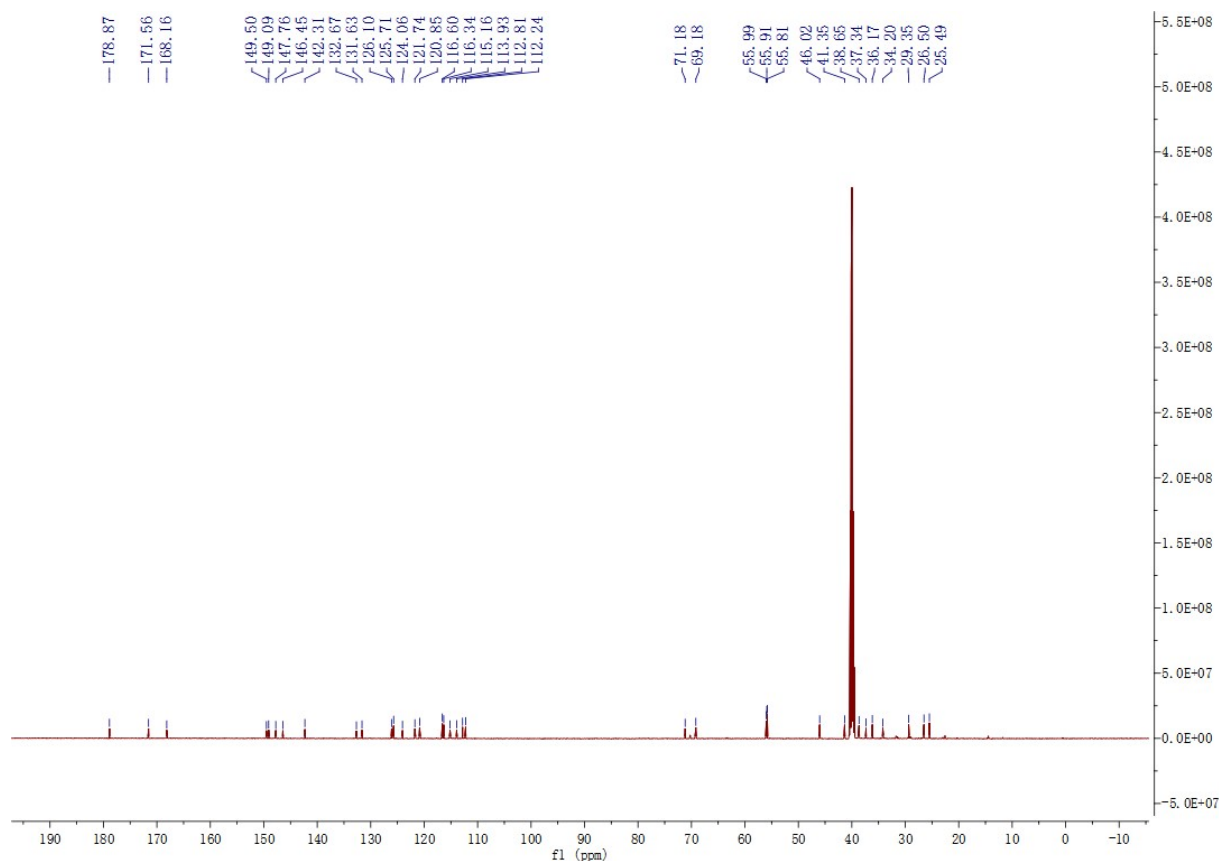

## Mass Spectrum SmartFormula Report

### Analysis Info

Analysis Name D:\data\Sample Detection\20230524\5C-Ben pos\_000004.d  
 Method 20230410 pos 100-2000  
 Sample Name  
 Comment

Acquisition Date 5/24/2023 2:24:08 PM

Operator  
 Instrument solariX

### Acquisition Parameter

|                       |            |                      |           |                           |                          |
|-----------------------|------------|----------------------|-----------|---------------------------|--------------------------|
| Acquisition Mode      | Single MS  | Acquired Scans       | 8         | Calibration Date          | Mon Apr 10 10:10:45 2023 |
| Polarity              | Positive   | No. of Cell Fills    | 1         | Data Acquisition Size     | 1048576                  |
| Broadband Low Mass    | 100.3 m/z  | No. of Laser Shots   | 500       | Data Processing Size (SI) | 2097152                  |
| Broadband High Mass   | 2000.0 m/z | Laser Power          | 20.0 Ip   | Apodization               | Full-Sine                |
| Source Accumulation   | 0.000 sec  | Laser Shot Frequency | 0.001 sec |                           |                          |
| Ion Accumulation Time | 0.100 sec  |                      |           |                           |                          |

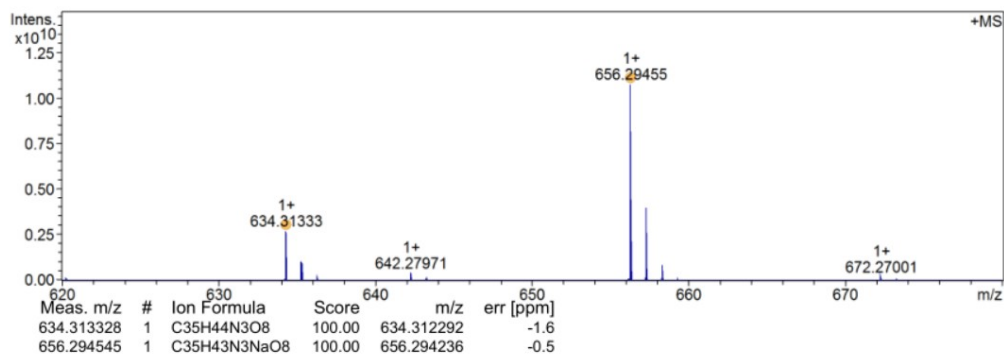

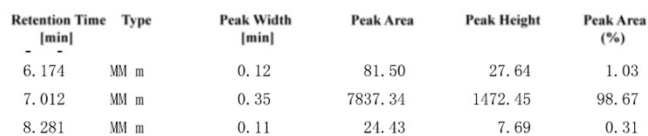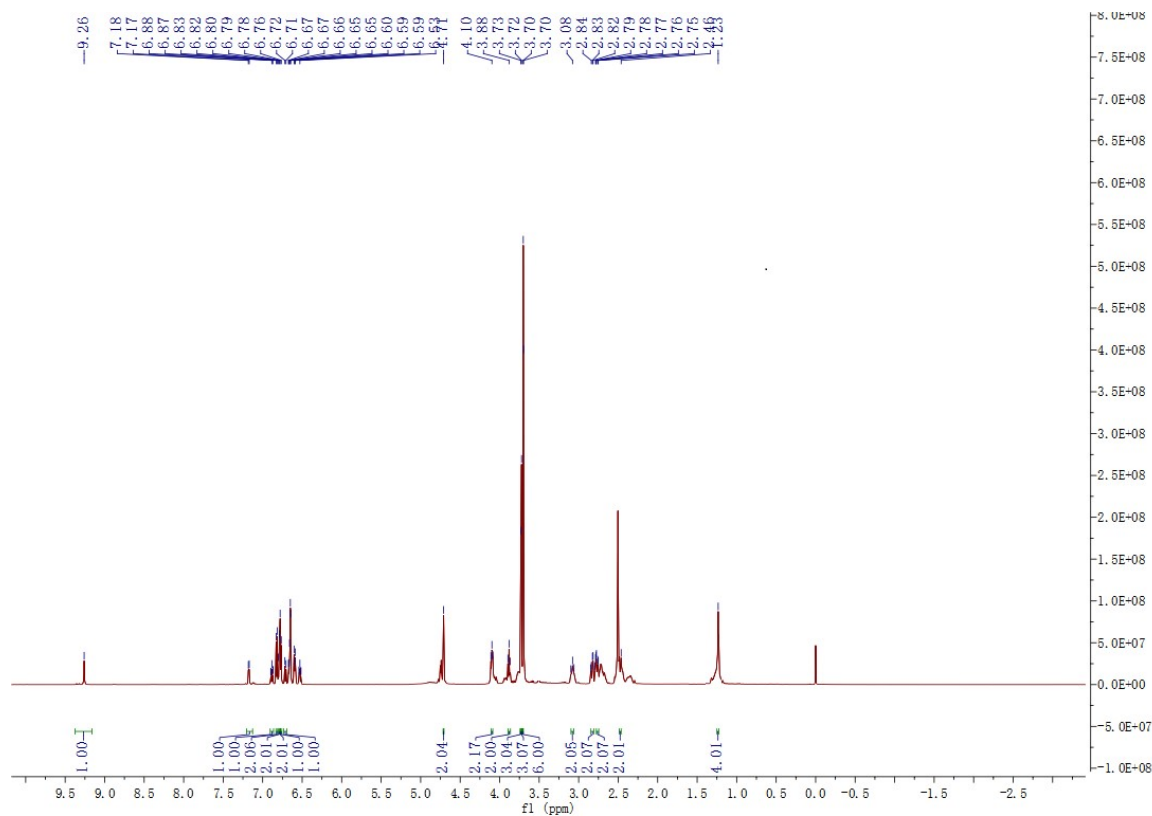

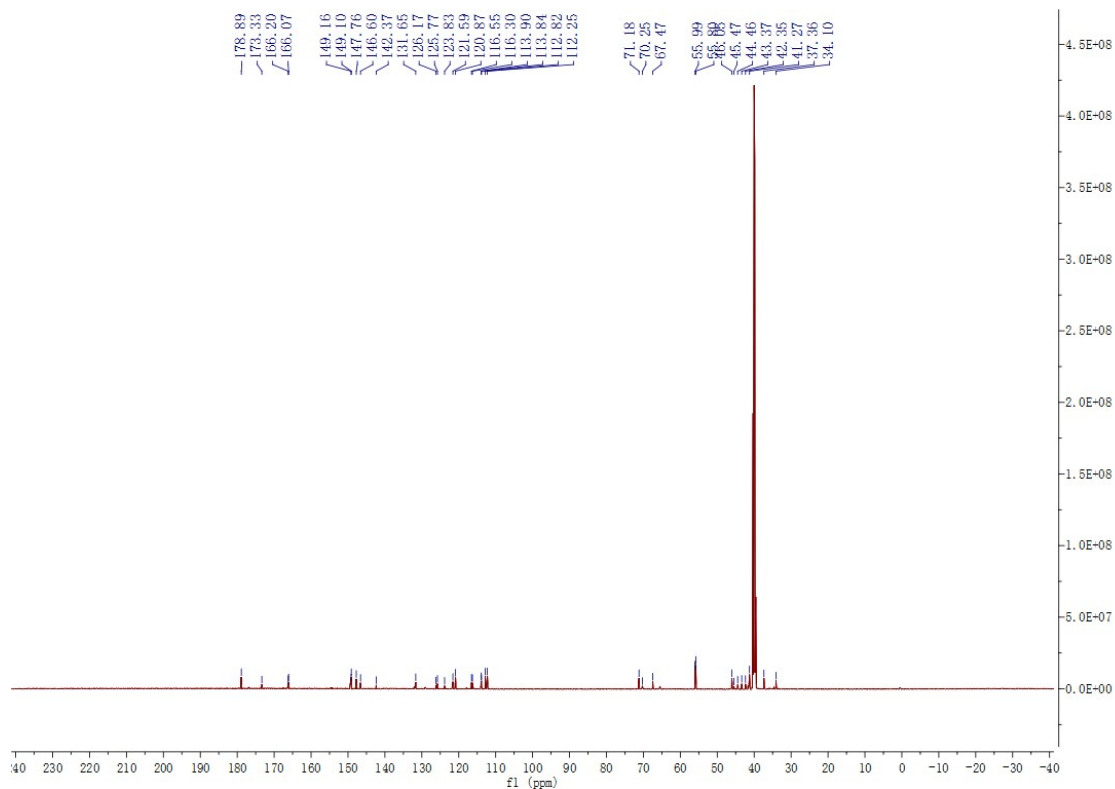

## Mass Spectrum SmartFormula Report

### Analysis Info

Analysis Name D:\data\Sample Detection\20230524\Pai-Ben pos\_000002.d  
 Method 20230410 pos 100-2000  
 Sample Name  
 Comment

Acquisition Date 5/24/2023 2:47:18 PM

Operator  
 Instrument solariX

### Acquisition Parameter

|                       |            |                      |           |                           |                          |
|-----------------------|------------|----------------------|-----------|---------------------------|--------------------------|
| Acquisition Mode      | Single MS  | Acquired Scans       | 8         | Calibration Date          | Mon Apr 10 10:10:45 2023 |
| Polarity              | Positive   | No. of Cell Fills    | 1         | Data Acquisition Size     | 1048576                  |
| Broadband Low Mass    | 100.3 m/z  | No. of Laser Shots   | 500       | Data Processing Size (SI) | 2097152                  |
| Broadband High Mass   | 2000.0 m/z | Laser Power          | 20.0 lp   | Apodization               | Full-Sine                |
| Source Accumulation   | 0.000 sec  | Laser Shot Frequency | 0.001 sec |                           |                          |
| Ion Accumulation Time | 0.100 sec  |                      |           |                           |                          |

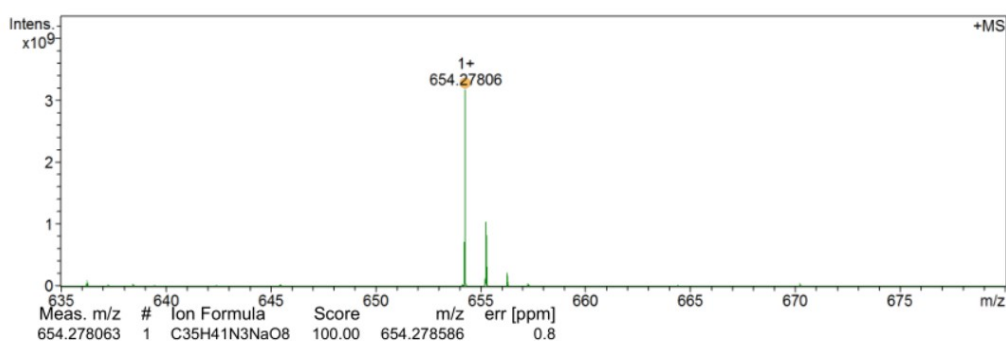





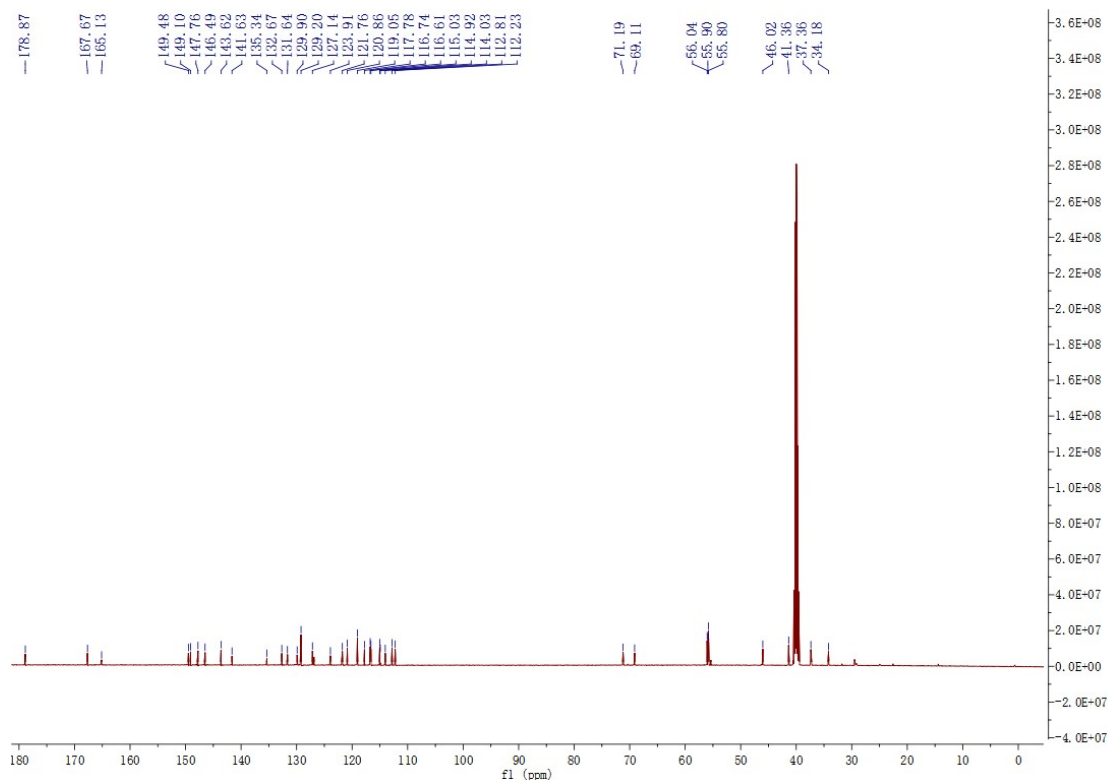

## Mass Spectrum SmartFormula Report

### Analysis Info

Analysis Name D:\data\Sample Detection\20230524\Ben-Ben pos\_000001.d  
 Method 20230410 pos 100-2000  
 Sample Name  
 Comment

Acquisition Date 5/24/2023 3:04:06 PM

Operator  
 Instrument solariX

### Acquisition Parameter

|                       |            |                      |           |                           |                          |
|-----------------------|------------|----------------------|-----------|---------------------------|--------------------------|
| Acquisition Mode      | Single MS  | Acquired Scans       | 8         | Calibration Date          | Mon Apr 10 10:10:45 2023 |
| Polarity              | Positive   | No. of Cell Fills    | 1         | Data Acquisition Size     | 1048576                  |
| Broadband Low Mass    | 100.3 m/z  | No. of Laser Shots   | 500       | Data Processing Size (SI) | 2097152                  |
| Broadband High Mass   | 2000.0 m/z | Laser Power          | 20.0 lp   | Apodization               | Full-Sine                |
| Source Accumulation   | 0.000 sec  | Laser Shot Frequency | 0.001 sec |                           |                          |
| Ion Accumulation Time | 0.100 sec  |                      |           |                           |                          |

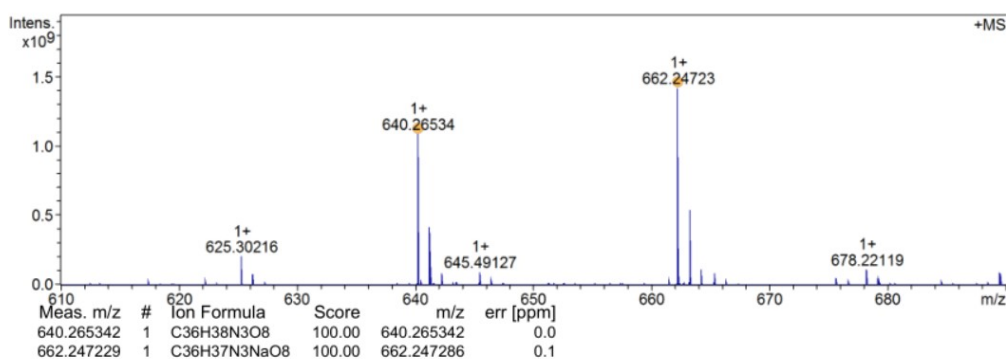

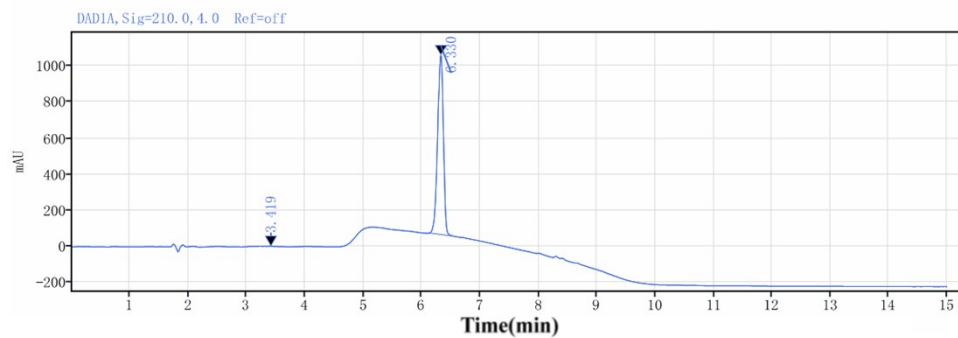

| Retention Time [min] | Type | Peak Width [min] | Peak Area | Peak Height | Peak Area (%) |
|----------------------|------|------------------|-----------|-------------|---------------|
| 3.419                | MM m | 0.14             | 8.95      | 2.21        | 0.13          |
| 6.330                | MM m | 0.41             | 6884.96   | 993.04      | 99.87         |

**Figure S18.  $^1\text{H}$  NMR,  $^{13}\text{C}$  NMR, FT-MS, HPLC of B8**

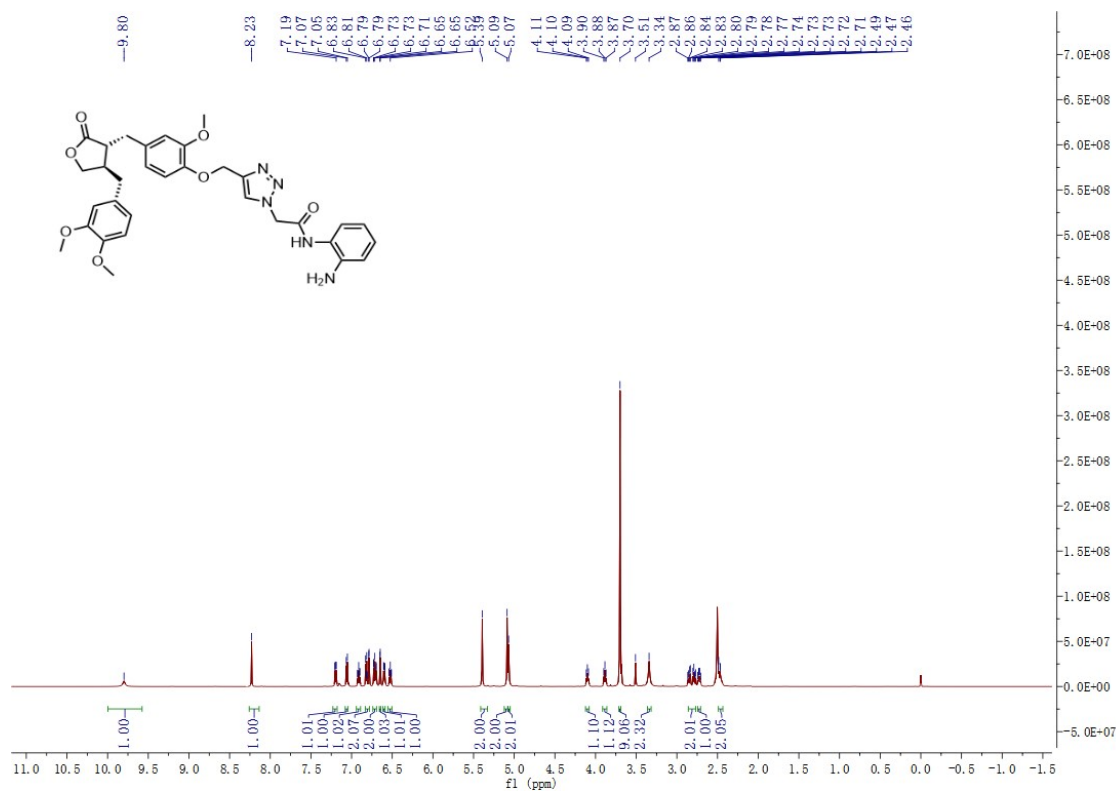



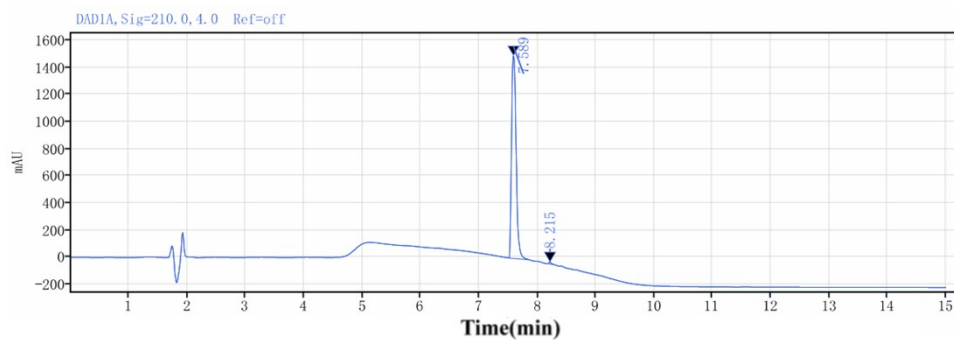

| Retention Time [min] | Type | Peak Width [min] | Peak Area | Peak Height | Peak Area (%) |
|----------------------|------|------------------|-----------|-------------|---------------|
| 7.589                | MM m | 0.36             | 8193.68   | 1492.40     | 99.56         |
| 8.215                | MM m | 0.09             | 36.60     | 15.13       | 0.44          |

## 2. IC<sub>50</sub> fitting curve of compound B7

**MV-411**

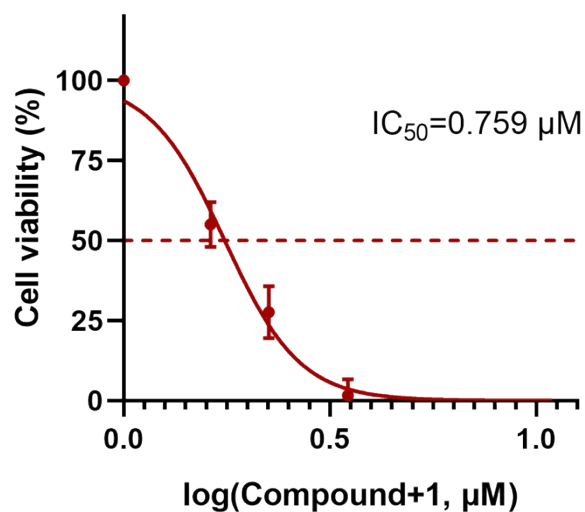

## 3. IC<sub>50</sub> fitting curve of HDAC isomer inhibitory activity of compound B7

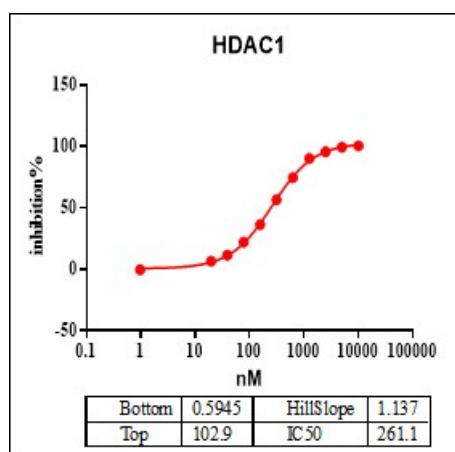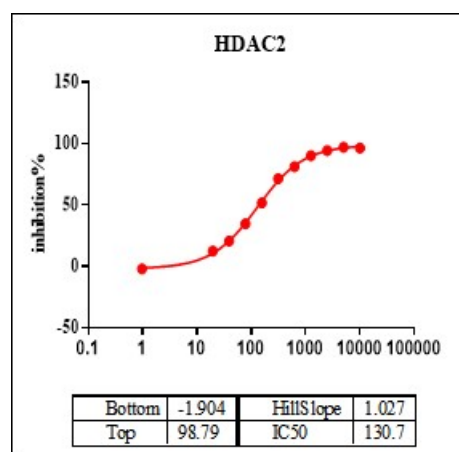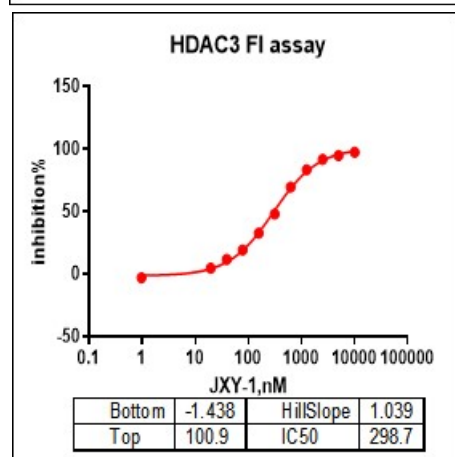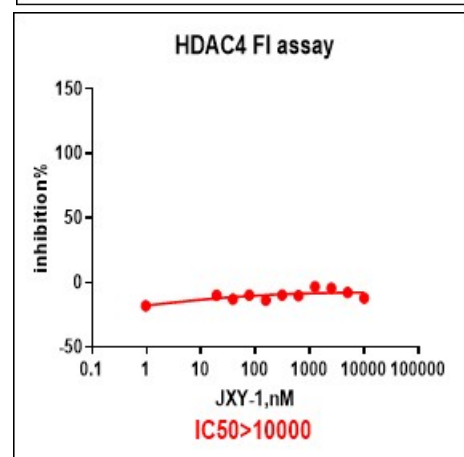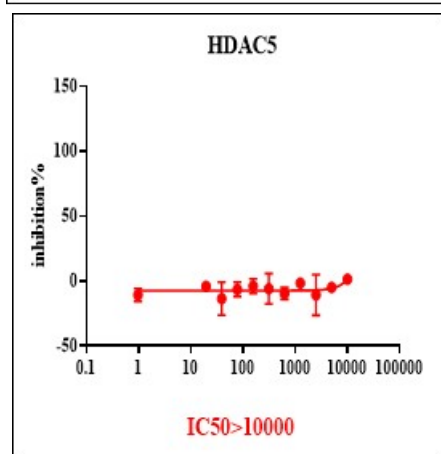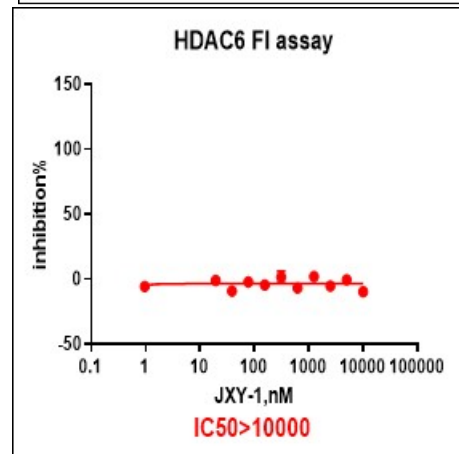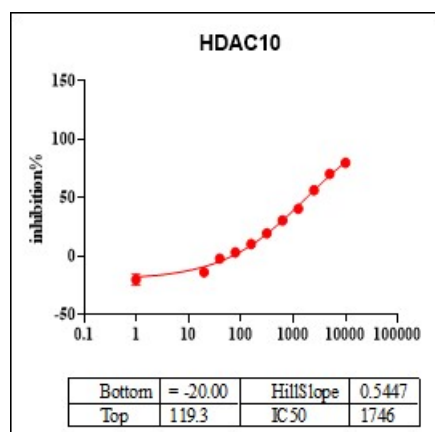

#### 4.1 western blot experiments

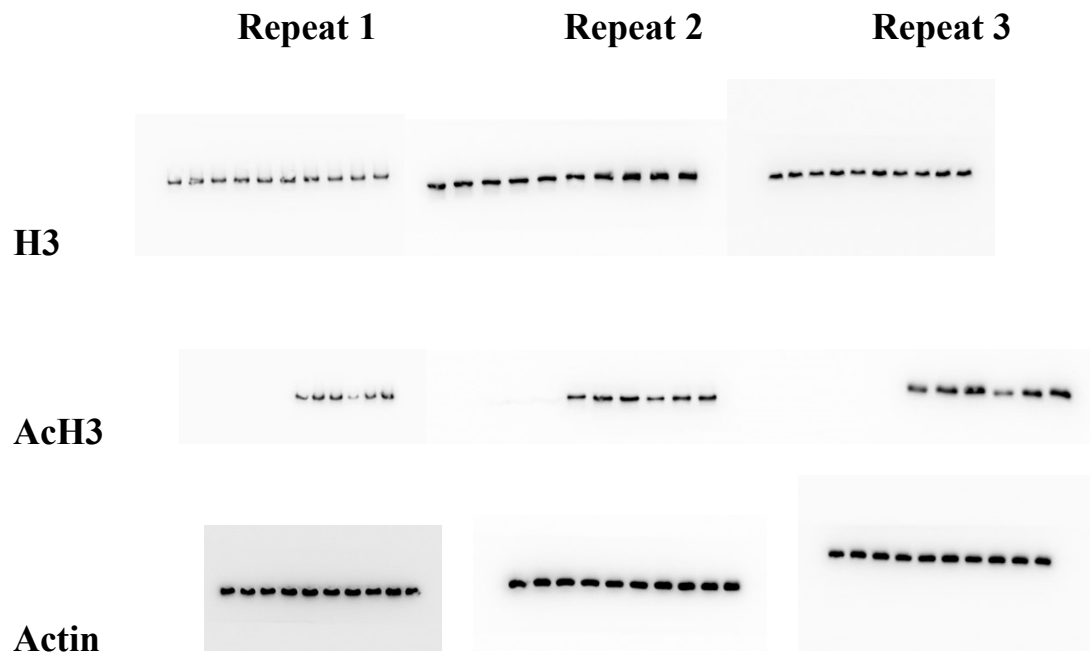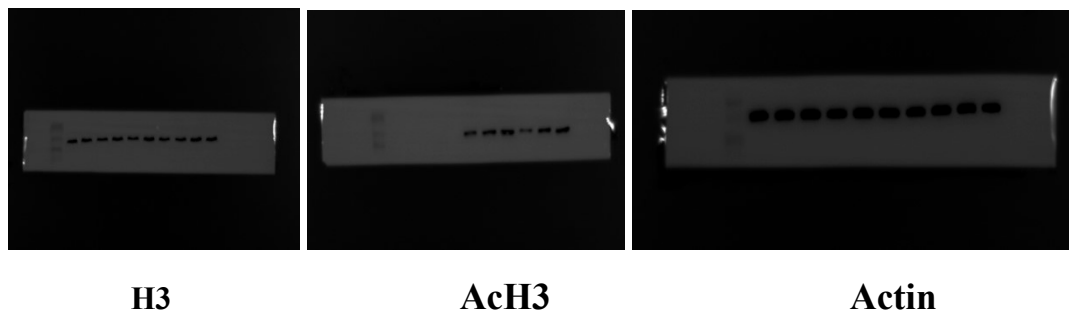

1. The Western blot membranes with markers in the previously provided supplementary data :

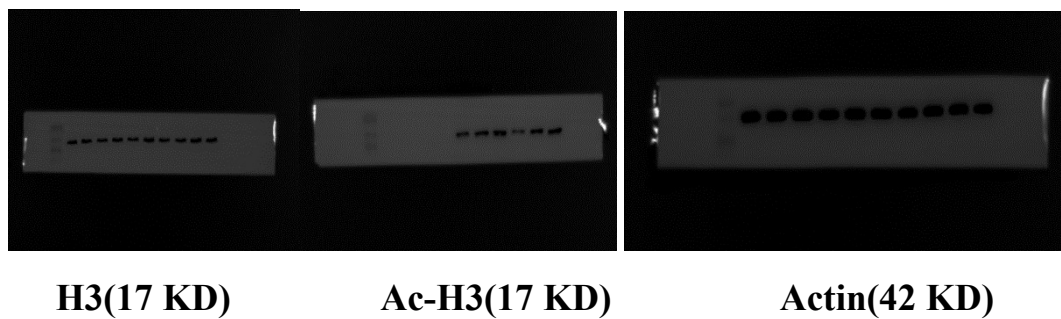

## 2. The supplementary full membrane Western blot:

Due to the expression of H3 and Ac-H3 affecting the luminescence of Actin, the membrane was trimmed during the Actin luminescence; however, it can be clearly identified as a full membrane through the markers.

### (1) Ac-H3 - repeat 1

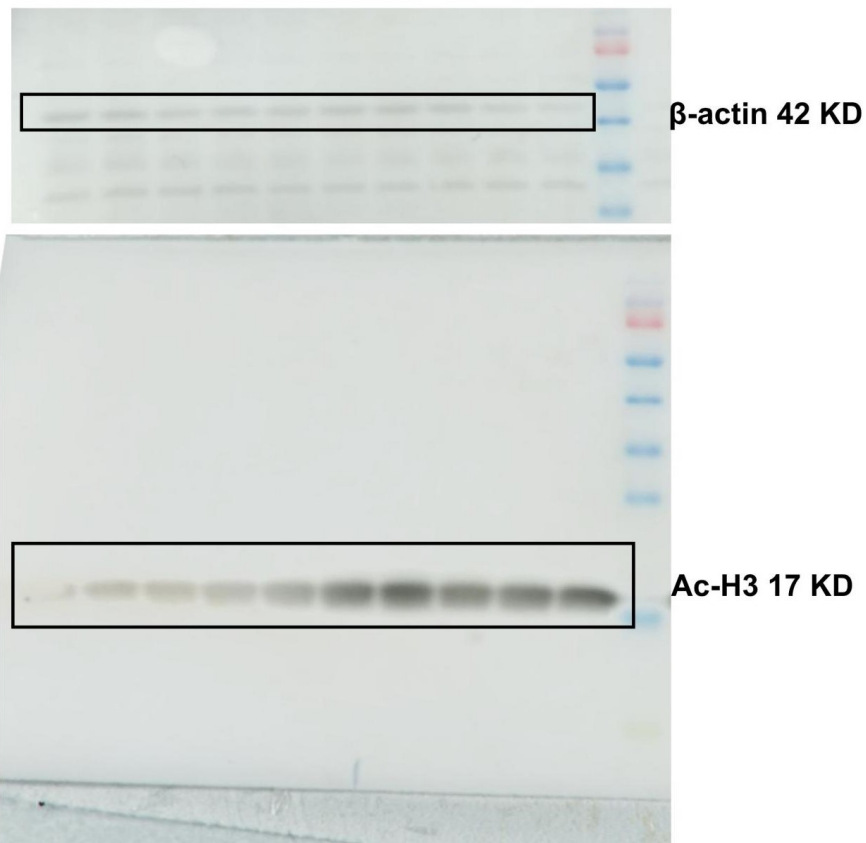



(2) Ac-H3 - repeat 2

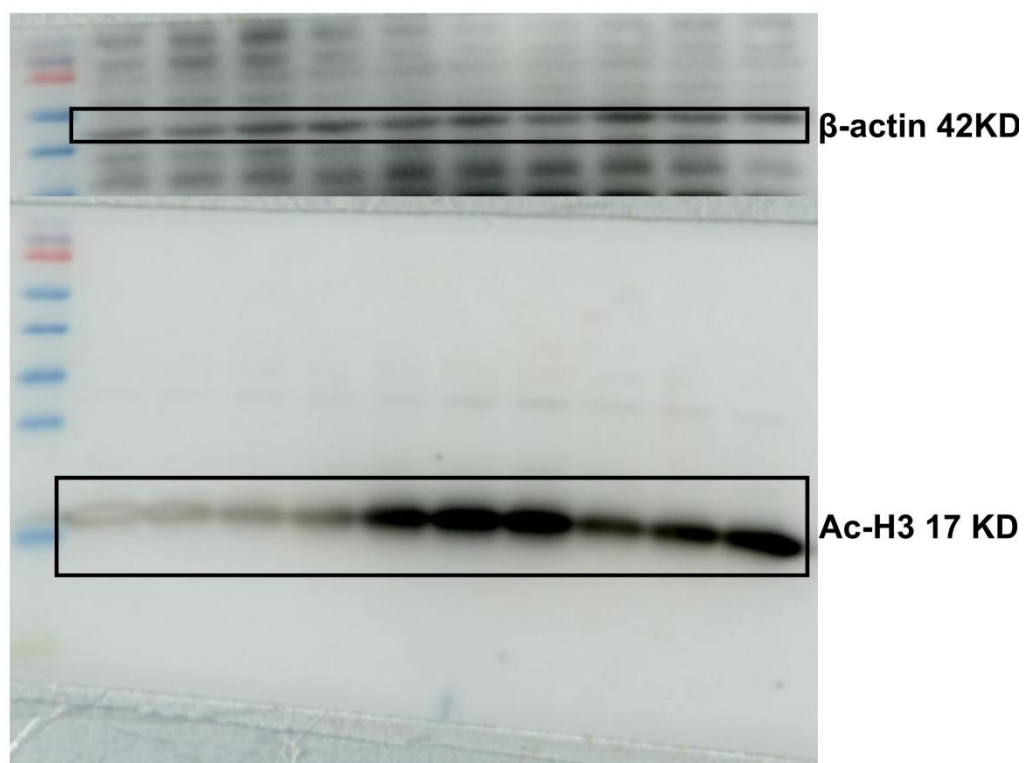

(3) H3 - repeat 1

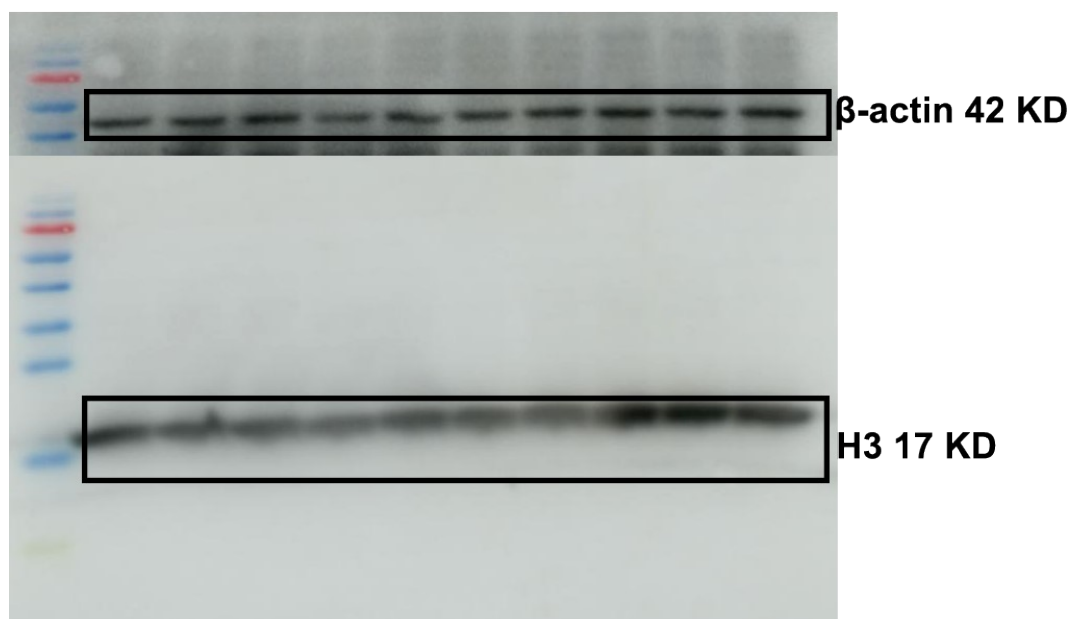

(4) H3 - repeat 2

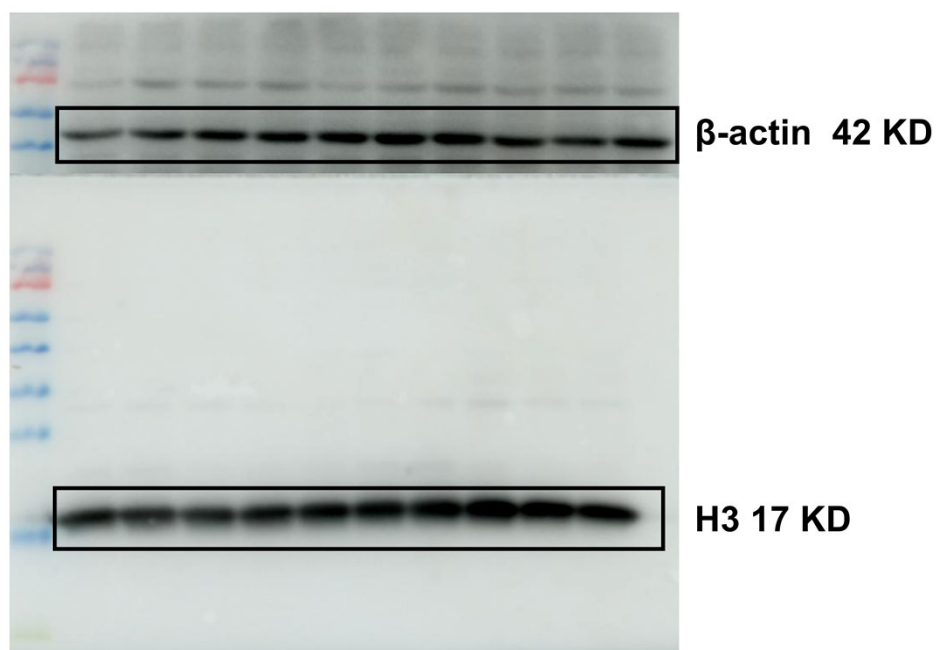

Supplement: d4ra00050a1.pdf [file d4ra00050a1.pdf]
