# Supplementary material for: Design, synthesis and activity evaluation of arctigenin derivatives with HDAC inhibition activity
Source: Royal Society of Chemistry journal article supplement (doi:10.1039/d4ra00050a), 2024-01-01

## Western blot experiments:

1. The Western blot membranes with markers in the previously provided supplementary data:

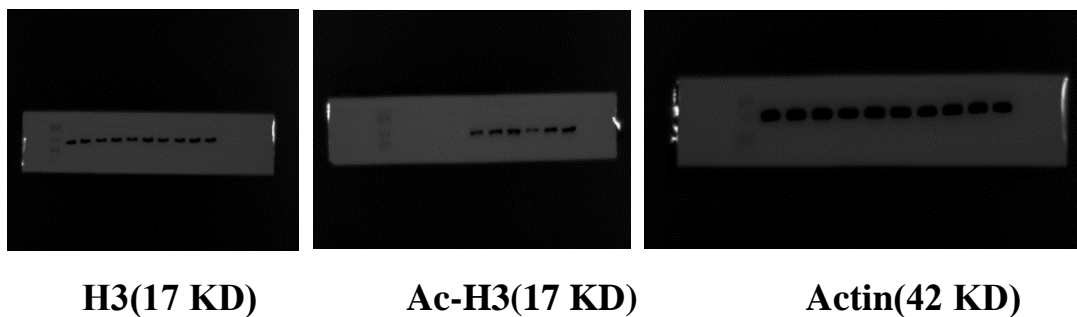

2. The supplementary full membrane Western blot:

Due to the expression of H3 and Ac-H3 affecting the luminescence of Actin, the membrane was trimmed during the Actin luminescence; however, it can be clearly identified as a full membrane through the markers.

(1) Ac-H3 - repeat 1

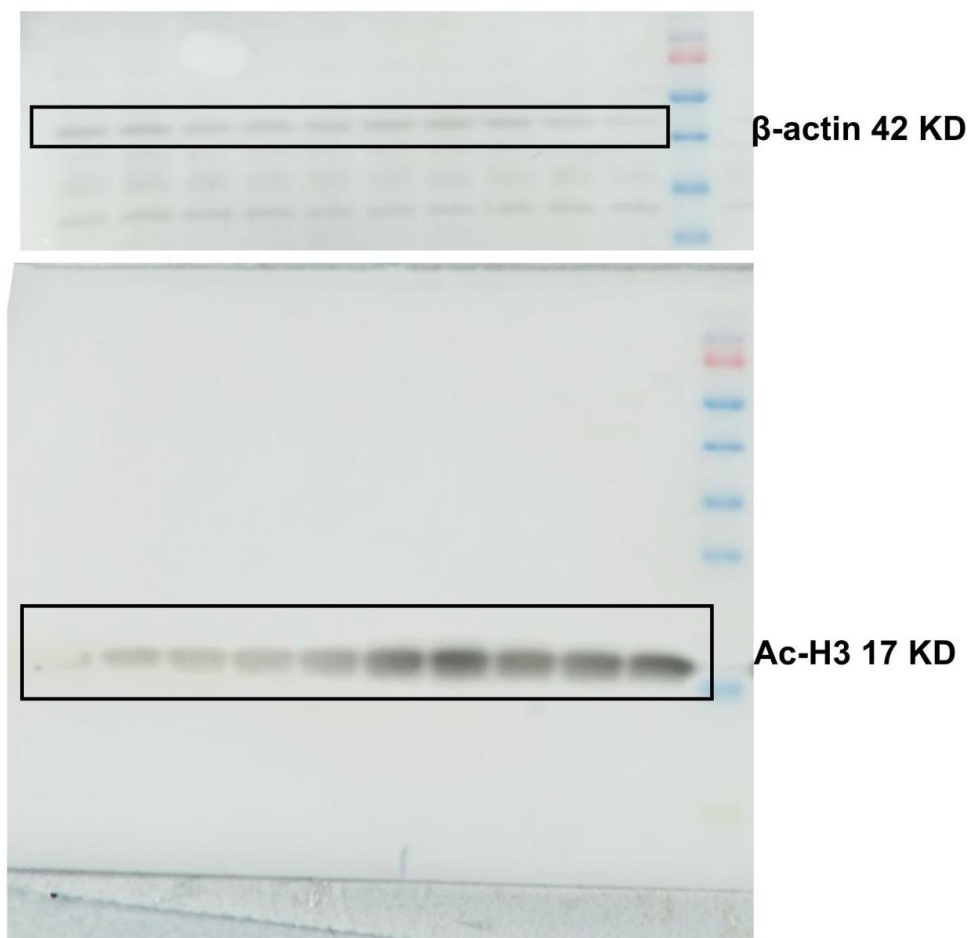

(2) Ac-H3 - repeat 2

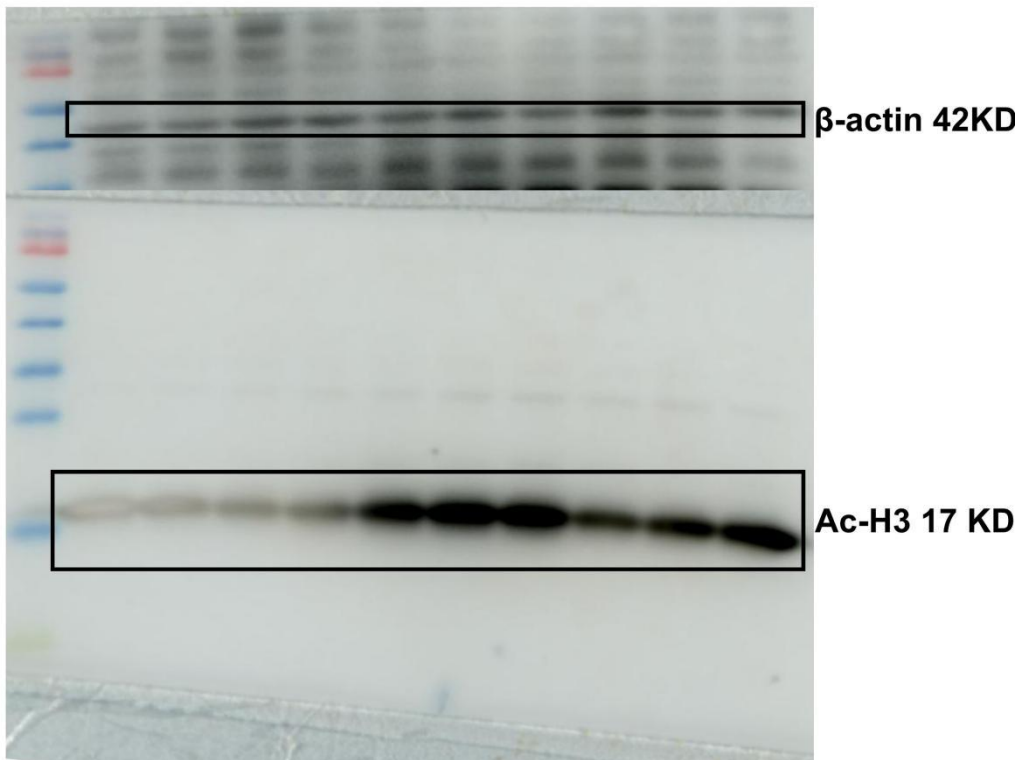

(3) H3 - repeat 1

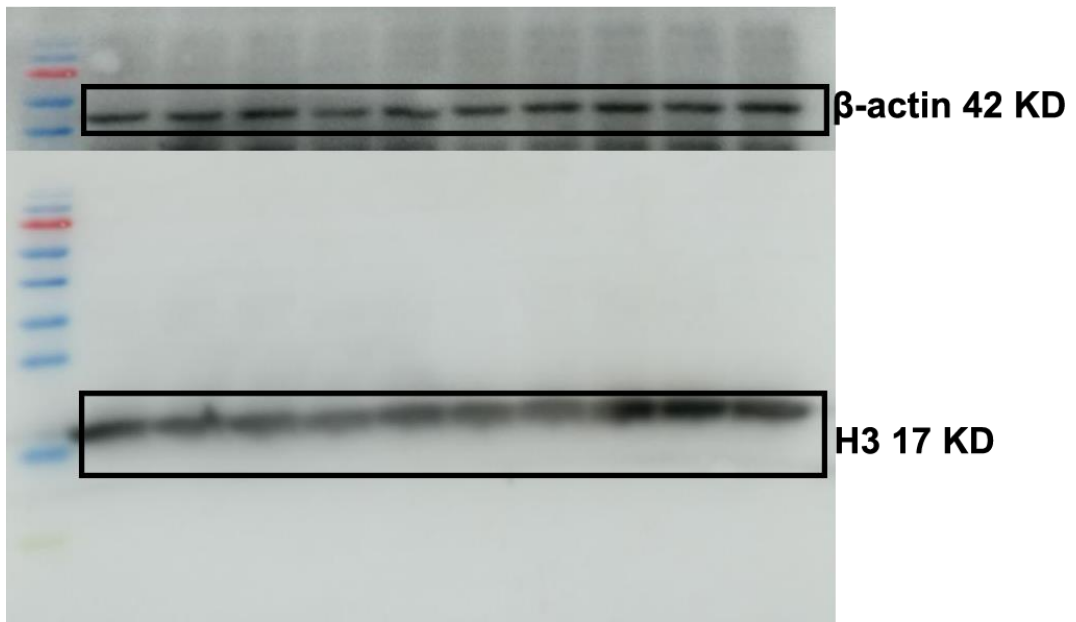

(4) H3 - repeat 2

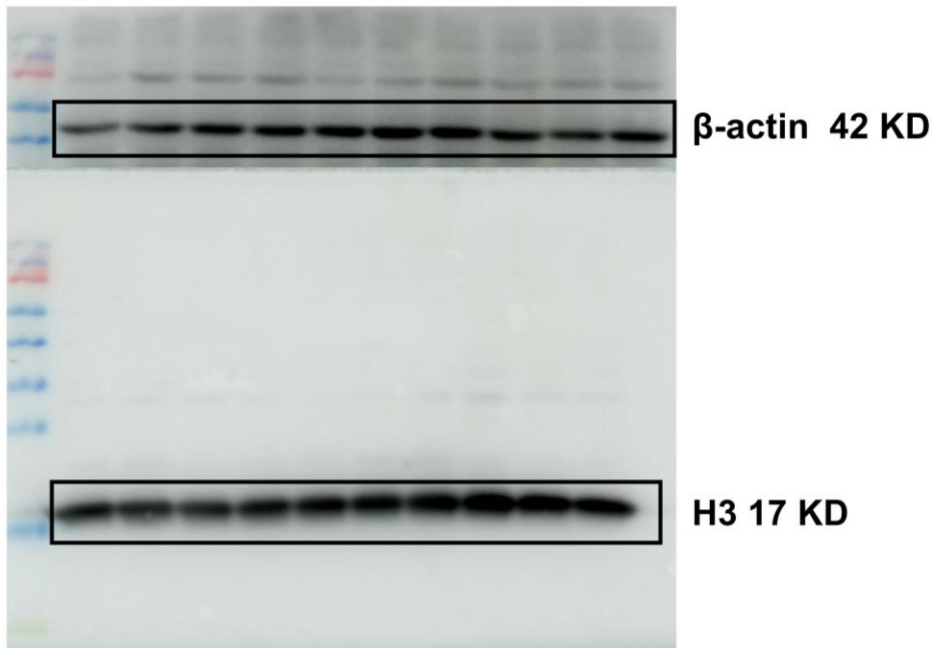

Supplement: d4ra00050a2.pdf [file d4ra00050a2.pdf]
